# Supplementary material for: A simple and highly effective water-compatible organocatalytic system for asymmetric direct Michael reactions of linear aldehydes to maleimides
Source: Royal Society of Chemistry journal article supplement (doi:10.1039/c3gc41024b), 2013-01-01
Supplement: c3gc41024b.pdf [file c3gc41024b.pdf]

A Simple and Highly Effective Water-Compatible Organocatalytic System for  
Asymmetric Direct Michael Reactions of Linear Aldehydes to Maleimides

Yupu Qiao and Allan D. Headley\*

*Department of Chemistry, Texas A&M University-Commerce*

*Commerce, TX 75429-3011, USA*

E-mail: allan.headley@tamuc.edu

Supporting Information

**Table of contents**

|                                                 |         |
|-------------------------------------------------|---------|
| General Information.....                        | S2      |
| Typical procedure for the Michael addition..... | S2      |
| The data of Michael reaction products.....      | S2-S6   |
| References.....                                 | S6      |
| Spectra of reaction products.....               | S7-S16  |
| HPLC spectra .....                              | S17-S26 |

**General information:** Commercial reagents were used without further purification, unless otherwise stated. Merck 60 silica gel was used for chromatography, and Whatman silica gel plates with fluorescence UV254 were used for thin-layer chromatography (TLC) analysis.  $^1\text{H}$  and  $^{13}\text{C}$  NMR spectra were recorded on the varian-400. Chemical shifts were reported in ppm from tetramethylsilane with the solvent resonance as the internal standard. All first-order splitting patterns were assigned on the basis of the appearance of the multiplet. Splitting patterns that could not be easily interpreted were designated as multiplet (m) or broad (br). The high resolution mass spectra were analyzed by using ESI-TOF high-acc from the Scripps Research Institute. All the compounds synthesized (shown in Table 1 and 2) in the manuscript are known compounds<sup>1</sup>, except those described below. Their relative and absolute configurations of the products were determined by comparison with the known  $^1\text{H}$  and  $^{13}\text{C}$  NMR, chiral HPLC analysis, and optical rotation values. Optical rotations were measured using a 1 mL cell with a 1 dm path length and reported as follows:  $[\alpha]_{\text{D}}^{20}$  ( $c$  in g per 100 mL of solvent). HPLC analysis was performed using ChiralPak columns.

#### Typical procedure for the Michael addition:

To the solution of Brine (0.4 mL) was added aldehyde (0.8 mmol), maleimide (0.4 mmol), catalyst **2** (0.04 mmol) and ILS-sulfonic acid **6a** (0.0412 mmol) at room temperature. The resulting mixture was stirred at 4°C for the time indicated in Table 2 and then quenched with 1 M HCl. The products were extracted three times with  $\text{CH}_2\text{Cl}_2$  (3×10 mL). The combined organic phase was dried over anhydrous  $\text{Na}_2\text{SO}_4$  and concentrated under reduced pressure to give the crude Michael product. The residue was purified by flash chromatography on silica gel to afford the desired products **7a-j**.

#### Data of Michael addition products shown in Table 2:<sup>1</sup>

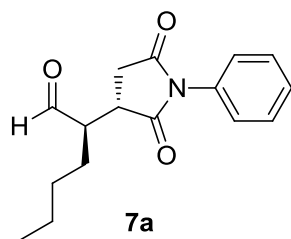

Yield: 69%.  $[\alpha]_{\text{D}}^{20} = +71$  ( $c$  0.6,  $\text{CHCl}_3$ ). (Lit<sup>[1a]</sup>:  $[\alpha]_{\text{D}}^{25} = +70.2$  ( $c$  1.0,  $\text{CHCl}_3$ )).  $^1\text{H}$  NMR (400 MHz,  $\text{CDCl}_3$ )  $\delta$  = 9.69 (s, 1H), 7.41 (t,  $J = 8\text{Hz}$ , 2H), 7.34(d,  $J = 8\text{Hz}$ , 1H), 7.21 (t,  $J = 8\text{Hz}$ , 2H), 3.30-3.25 (m, 1H), 2.97-2.90 (m, 2H), 2.53 (dd,  $J = 20\text{Hz}$ , 8Hz, 1H), 1.90-1.80 (m, 1H), 1.64-1.54 (m, 1H), 1.52 (s, 1H), 1.46-1.38 (m, 2H), 1.37-1.28 (m, 2H), 1.19 (s, 1H), 0.87 (t,  $J = 8\text{Hz}$ , 3H).  $^{13}\text{C}$  NMR (100 MHz,

CDCl<sub>3</sub>)  $\delta$  = 200.5, 176.6, 174.1, 130.9, 128.2, 127.7, 125.5, 51.6, 37.6, 31.4, 28.8, 24.9, 21.6, 12.8. HPLC: Chiralpak AD-H, *i*-propanol/hexane = 15/85, 25°C, flow rate = 0.8 mL/min,  $\lambda$  = 254 nm; major diastereomer:  $t_{\text{minor}}$  = 18.305 min,  $t_{\text{major}}$  = 34.795 min, *ee* = 96%.

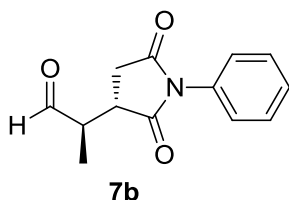

Yield: 74%.  $[\alpha]_{\text{D}}^{20}$  = +52 (*c* 0.6, CHCl<sub>3</sub>). <sup>1</sup>H NMR (400 MHz, CDCl<sub>3</sub>)  $\delta$  = 9.72 (s, 1H), 7.48 (t, *J* = 8Hz, 2H), 7.41 (t, *J* = 2Hz, 1H), 7.28 (t, *J* = 7.2Hz, 2H), 3.43-3.38 (m, 1H), 3.22-3.15 (m, 1H), 3.06-2.99 (dd, *J* = 16Hz, 8Hz, 1H), 2.57-2.51 (dd, *J* = 16Hz, 4Hz, 1H), 1.33 (d, *J* = 8Hz, 3H). <sup>13</sup>C NMR (100 MHz, CDCl<sub>3</sub>)  $\delta$  = 201.3, 177.6, 175.0, 131.8, 129.2, 128.7, 126.4, 47.0, 39.5, 31.6, 9.7. HPLC: Chiralpak AD-H, *i*-propanol/hexane = 1/9, 25 °C, flow rate = 0.8 mL/min,  $\lambda$  = 254 nm; major diastereomer:  $t_{\text{minor}}$  = 42.84 min,  $t_{\text{major}}$  = 49.80 min, *ee* = 91%.

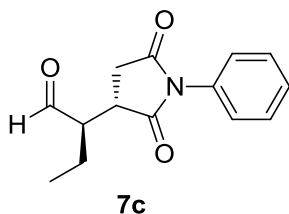

Yield: 66%.  $[\alpha]_{\text{D}}^{20}$  = +35.0 (*c* = 0.8, CHCl<sub>3</sub>). <sup>1</sup>H NMR (400 MHz, CDCl<sub>3</sub>)  $\delta$  = 9.77 (s, 1H), 7.48 (t, *J* = 8Hz, 2H), 7.40 (t, *J* = 7.2Hz, 1H), 7.28 (t, *J* = 8Hz, 2H), 3.37-3.32 (m, 1H), 3.04-2.89 (m, 2H), 2.60-2.54 (dd, *J* = 20Hz, 8Hz, 1H), 2.04-1.93 (m, 1H), 1.77-1.70 (m, 1H), 1.14 (t, *J* = 8Hz, 3H). <sup>13</sup>C NMR (100 MHz, CDCl<sub>3</sub>)  $\delta$  = 201.5, 177.6, 175.0, 131.9, 129.2, 128.7, 126.4, 54.3, 38.4, 32.4, 19.6, 12.3. HPLC: Chiralpak AD-H, *i*-propanol/hexane = 5/95, 25 °C, flow rate = 0.8 mL/min,  $\lambda$  = 254 nm; major diastereomer:  $t_{\text{minor}}$  = 20.30 min,  $t_{\text{major}}$  = 26.16 min, *ee* = 96%. HRMS (ESI-TOF high-acc) *m/z* calcd for C<sub>14</sub>H<sub>16</sub>NO<sub>3</sub><sup>+</sup> (MH<sup>+</sup>): 246.1125, found: 246.1129.

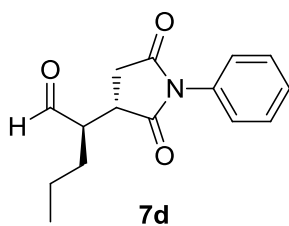

Yield: 51%.  $[\alpha]_{\text{D}}^{20}$  = -7.2 (*c* 0.3, CHCl<sub>3</sub>). <sup>1</sup>H NMR (400 MHz, CDCl<sub>3</sub>)  $\delta$  = 9.64 (s, 1H), 7.48 (t, *J* = 8Hz, 2H), 7.40 (t, *J* = 7.2Hz, 1H), 7.31 (t, *J* = 10.8Hz, 2H), 3.29-3.24 (m, 1H), 3.10-3.00 (m, 1H), 2.90-2.83 (dd, *J* = 20 Hz, 12Hz, 1H), 2.64-2.58 (dd, *J* = 20 Hz, 8Hz, 1H), 2.02-1.86 (m, 1H), 1.67-1.48 (m, 2H), 1.26 (s, 1H), 1.06 (t, *J* = 8Hz, 3H). <sup>13</sup>C NMR (100 MHz, CDCl<sub>3</sub>)  $\delta$  = 202.0, 178.2, 175.2, 132.2,

129.1, 128.6, 126.7, 51.4, 39.0, 31.5, 28.5, 20.7, 13.9. HPLC: Chiralpak AD-H, *i*-propanol/hexane = 5/95, 25 °C, flow rate = 1.0 mL/min,  $\lambda$  = 254 nm; major diastereomer:  $t_{\text{minor}}$  = 45.44 min,  $t_{\text{major}}$  = 87.18 min,  $ee$  = 94%. HRMS (ESI-TOF high-acc)  $m/z$  calcd for  $C_{15}H_{18}NO_3^+$  ( $MH^+$ ): 260.1281, found: 260.1283.

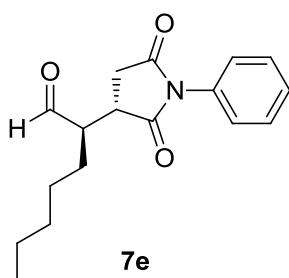

Yield: 76%.  $[\alpha]_D^{20}$  = +64.8 ( $c$  0.8,  $CHCl_3$ ).  $^1H$  NMR (400 MHz,  $CDCl_3$ )  $\delta$  = 9.76 (d,  $J$  = 4Hz, 1H), 7.47 (t,  $J$  = 4.8Hz, 2H), 7.43-7.39 (m, 1H), 7.30-7.26 (m, 1H), 3.37-3.32 (m, 1H), 3.05-2.97 (m, 2H), 2.67-2.54 (m, 1H), 1.96-1.86 (m, 1H), 1.71-1.61 (m, 1H), 1.51 (s, 2H), 1.36-1.33 (m, 4H), 0.91 (t,  $J$  = 8Hz, 3H).  $^{13}C$  NMR (100 MHz,  $CDCl_3$ )  $\delta$  = 201.5, 177.6, 175.1, 131.9, 129.2,

128.7, 126.4, 52.7, 38.6, 32.4, 31.7, 27.3, 26.2, 22.3, 13.9. HPLC: Chiralpak AD-H, *i*-propanol/hexane = 1/9, 25 °C, flow rate = 0.8 mL/min,  $\lambda$  = 254 nm; major diastereomer:  $t_{\text{minor}}$  = 22.30 min,  $t_{\text{major}}$  = 48.34 min,  $ee$  = 96%. HRMS (ESI-TOF high-acc)  $m/z$  calcd for  $C_{17}H_{22}NO_3^+$  ( $MH^+$ ): 288.1594, found: 288.1595.

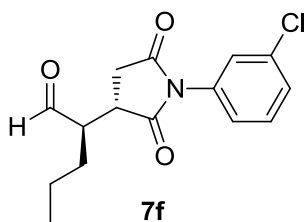

Yield: 60%.  $[\alpha]_D^{20}$  = +29.6 ( $c$  0.3,  $CHCl_3$ ).  $^1H$  NMR (400 MHz,  $CDCl_3$ )  $\delta$  = 9.75 (s, 1H), 7.44-7.35 (m, 3H), 7.27-7.22 (m, 1H), 3.33-3.29 (m, 1H), 3.05-2.98 (m, 1H), 2.60-2.54 (dd,  $J$  = 20Hz, 4Hz, 1H), 1.96-1.87 (m, 1H), 1.73-1.67 (m, 1H), 1.59-1.52 (m, 2H), 1.25 (s, 1H), 1.02 (t,  $J$  = 8Hz, 3H).  $^{13}C$  NMR (100 MHz,

$CDCl_3$ )  $\delta$  = 201.4, 177.2, 174.6, 134.7, 132.9, 130.1, 128.9, 126.8, 124.7, 52.7, 38.5, 32.6, 28.5, 20.9, 14.0. HPLC: Chiralpak AD-H, *i*-propanol/hexane = 1/9, 25 °C, flow rate = 0.8 mL/min,  $\lambda$  = 254 nm; major diastereomer:  $t_{\text{minor}}$  = 33.06 min,  $t_{\text{major}}$  = 46.76 min,  $ee$  = 95%. HRMS (ESI-TOF high-acc)  $m/z$  calcd for  $C_{15}H_{17}ClNO_3^+$  ( $MH^+$ ): 294.0891, found: 294.0895.

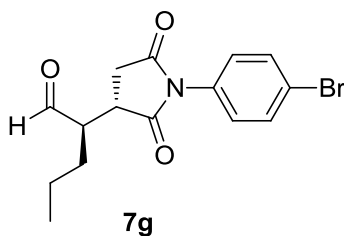

Yield: 63%.  $[\alpha]_D^{20}$  = +17 ( $c$  0.3,  $CHCl_3$ ).  $^1H$  NMR (400 MHz,  $CDCl_3$ )  $\delta$  = 9.76 (d,  $J$  = 8Hz, 1H), 7.62 (d,  $J$  = 8Hz,

2H), 7.28-7.20 (m, 2H), 3.35-3.28 (m, 1H), 3.07-2.98 (m, 2H), 2.61-2.54 (m, 1H), 1.98-1.87 (m, 1H), 1.70-1.65 (m, 1H), 1.60-1.53 (m, 2H), 1.27 (d,  $J = 8\text{Hz}$ , 1H), 1.03 (t,  $J = 4\text{Hz}$ , 3H).  $^{13}\text{C}$  NMR (100 MHz,  $\text{CDCl}_3$ )  $\delta = 201.4, 177.3, 174.7, 132.4, 130.9, 128.0, 122.6, 52.7, 38.5, 32.6, 28.5, 21.0, 14.0$ . HPLC: Chiralpak AD-H, *i*-propanol/hexane = 5/95, 25 °C, flow rate = 1.0 mL/min,  $\lambda = 254\text{ nm}$ ; major diastereomer:  $t_{\text{major}} = 87.88\text{ min}$ ,  $t_{\text{minor}} = 99.41\text{ min}$ ,  $ee = 94\%$ . HRMS (ESI-TOF high-acc)  $m/z$  calcd for  $\text{C}_{15}\text{H}_{17}\text{ClNO}_3^+$  ( $\text{MH}^+$ ): 338.0386, found: 338.0375.

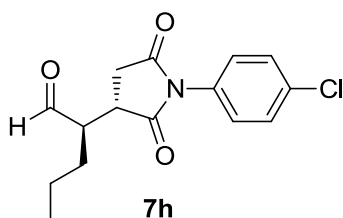

Yield: 51%.  $[\alpha]_{\text{D}}^{20} = -5.1$  ( $c\ 0.1$ ,  $\text{CHCl}_3$ ).  $^1\text{H}$  NMR (400 MHz,  $\text{CDCl}_3$ )  $\delta = 9.62$  (s, 1H), 7.45 (d,  $J = 8\text{Hz}$ , 2H), 7.29 (d,  $J = 12\text{Hz}$ , 2H), 3.30-3.25 (m, 1H), 3.08-3.03 (m, 1H), 2.86 (dd,  $J = 16\text{Hz}, 8\text{Hz}$ , 1H), 2.60 (dd,  $J = 16\text{Hz}, 4\text{Hz}$ , 1H), 2.00-1.93 (m, 1H), 1.55 (s, 2H), 1.34 (s, 2H), 1.06 (t,  $J = 8\text{Hz}$ , 3H).  $^{13}\text{C}$  NMR (100 MHz,  $\text{CDCl}_3$ )  $\delta = 202.0, 178.0, 174.9, 134.5, 130.6, 129.4, 127.9, 51.5, 39.0, 31.4, 28.5, 20.7, 13.9$ . HPLC: Chiralpak AD-H, *i*-propanol/hexane = 1/9, 25 °C, flow rate = 0.8 mL/min,  $\lambda = 254\text{ nm}$ ; major diastereomer:  $t_{\text{minor}} = 33.03\text{ min}$ ,  $t_{\text{major}} = 69.45\text{ min}$ ,  $ee = 95\%$ . HRMS (ESI-TOF high-acc)  $m/z$  calcd for  $\text{C}_{15}\text{H}_{17}\text{ClNO}_3^+$  ( $\text{MH}^+$ ): 294.0891, found: 294.0890.

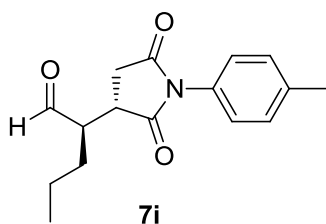

Yield: 15%.  $[\alpha]_{\text{D}}^{20} = -41.5$  ( $c\ 0.1$ ,  $\text{CHCl}_3$ ).  $^1\text{H}$  NMR (400 MHz,  $\text{CDCl}_3$ )  $\delta = 9.64$  (s, 1H), 7.29-7.15 (m, 4H), 3.28-3.23 (m, 1H), 3.09-2.96 (m, 1H), 2.89-2.82 (dd,  $J = 20\text{Hz}, 12\text{Hz}$ , 1H), 2.63-2.57 (dd,  $J = 20\text{Hz}, 12\text{Hz}$ , 1H), 2.38 (s, 3H), 1.99-1.90 (m, 1H), 1.54 (s, 3H), 1.25 (s, 1H), 1.05 (t,  $J = 4\text{Hz}$ , 3H).  $^{13}\text{C}$  NMR (100 MHz,  $\text{CDCl}_3$ )  $\delta = 202.0, 178.3, 175.4, 138.7, 129.9, 126.5, 126.3, 51.4, 39.1, 31.5, 28.5, 21.2, 20.7, 13.9$ . HPLC: Chiralpak AD-H, *i*-propanol/hexane = 15/85, 25 °C, flow rate = 0.8 mL/min,  $\lambda = 254\text{ nm}$ ; major diastereomer:  $t_{\text{minor}} = 25.09\text{ min}$ ,  $t_{\text{major}} = 26.93\text{ min}$ ,  $ee = 86\%$ . HRMS (ESI-TOF high-acc)  $m/z$  calcd for  $\text{C}_{16}\text{H}_{20}\text{NO}_3^+$  ( $\text{MH}^+$ ): 274.1438, found: 274.1436.

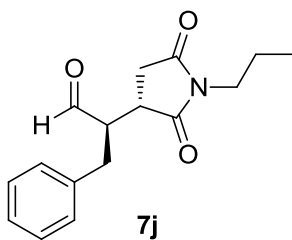

Yield: 53%.  $[\alpha]_D^{20} = +5.9$  ( $c$  0.2,  $\text{CHCl}_3$ ).  $^1\text{H NMR}$  (400 MHz,  $\text{CDCl}_3$ )  $\delta = 9.67$  (s, 1H), 7.37-7.22 (m, 5H), 3.54-3.45 (m, 2H), 3.36-3.31 (dd,  $J = 16\text{Hz}$ , 8Hz, 1H), 2.73-2.66 (m, 2H), 2.64-2.60 (m, 1H), 2.49-2.44 (dd,  $J = 12\text{Hz}$ , 4Hz, 1H), 1.66-1.56 (m, 2H), 1.26 (s, 1H), 0.91 (t,  $J = 4\text{Hz}$ , 3H).  $^{13}\text{C NMR}$  (100 MHz,  $\text{CDCl}_3$ )  $\delta = 201.0$ , 178.9, 176.0, 136.8, 129.1, 128.7, 127.3, 53.0, 40.6, 38.5, 32.8, 31.2, 20.8, 11.2. HPLC: Chiralpak AD-H, *i*-propanol/hexane = 1/9, 25 °C, flow rate = 0.8 mL/min,  $\lambda = 254$  nm; major diastereomer:  $t_{\text{major}} = 19.40$  min,  $t_{\text{minor}} = 29.25$  min,  $ee = 90\%$ . HRMS (ESI-TOF high-acc)  $m/z$  calcd for  $\text{C}_{16}\text{H}_{20}\text{NO}_3^+$  ( $\text{MH}^+$ ): 274.1438, found: 274.1440.

#### References:

- (a) G.-L. Zhao, Y. Xu, H. Sundén, L. Eriksson, M. Sayah, A. Córdova, *Chem. Commun.*, 2007, 734-735; (b) F. Yu, Z. Jin, H. Huang, T. Ye, X. Liang, J. Ye, *Org. Biomol. Chem.*, 2010, **8**, 4767-4774; (c) F. Xue, L. Liu, S. Zhang, W. Duan, W. Wang, *Chem. Eur. J.*, 2010, **16**, 7979-7982; (d) J.-F. Bai, L. Peng, L.-L. Wang, L.-X. Wang, X.-Y. Xu, *Tetrahedron*, 2010, **66**, 8928-8932; (e) T. Miura, S. Nishida, A. Masuda, N. Tada, A. Itoh, *Tetrahedron Lett.*, 2011, **52**, 4158-4160; (f) T. Miura, A. Masuda, M. Ina, K. Nakashima, S. Nishida, N. Tada, A. Itoh, *Tetrahedron: Asymmetry*, 2011, **22**, 1605-1609; (g) Z. Ma, Y. Liu, P. Li, H. Ren, Y. Zhu, J. Tao, *Tetrahedron: Asymmetry*, 2011, **22**, 1740-1748; (h) Z.-W. Ma, Y.-X. Liu, W.-J. Zhang, Y. Tao, Y. Zhu, J.-C. Tao, M.-S. Tang, *Eur. J. Org. Chem.*, 2011, 6747-6754; (i) T. C. Nugent, A. Sadiq, A. Bibi, T. Heine, L. L. Zeonjuk, N. Vankova, B. S. Bassil, *Chem. Eur. J.*, 2012, **18**, 4088-4098; (j) A. Avila, R. Chinchilla, C. Najera, *Tetrahedron: Asymmetry*, 2012, **23**, 1625-1627; (k) C. G. Kokotos, *Org. Lett.*, 2013, **15**, 2406; (l) A. Avila, R. Chinchilla, E. Gomez-Bengoia, C. Najera, *Eur. J. Org. Chem.*, 2013, DOI: 10.1002/ejoc.201300492.

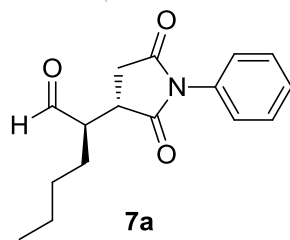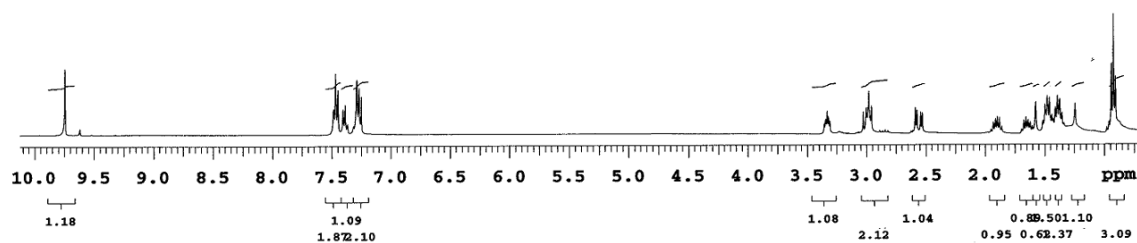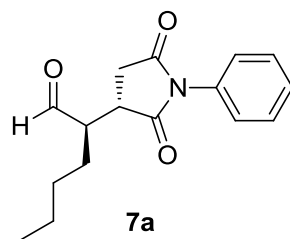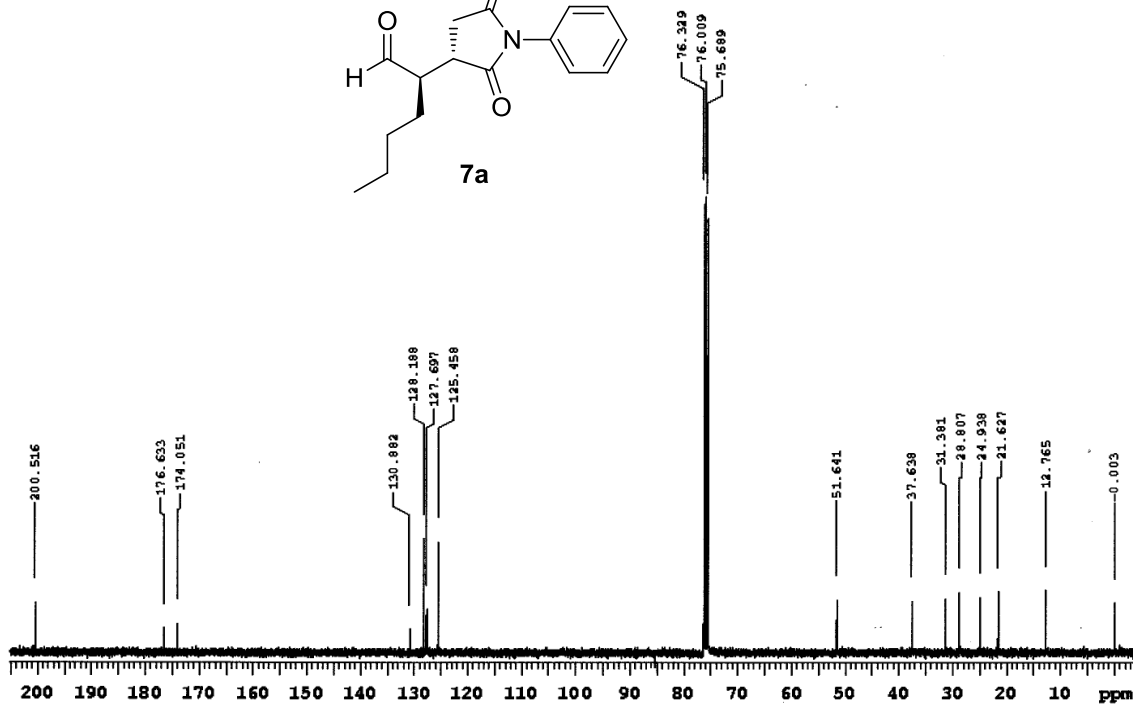

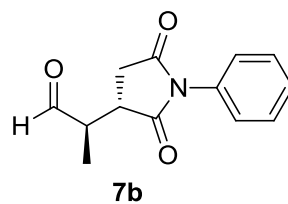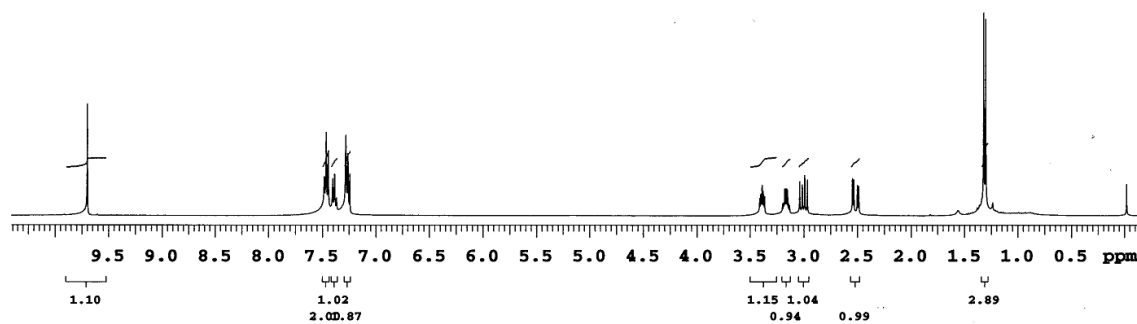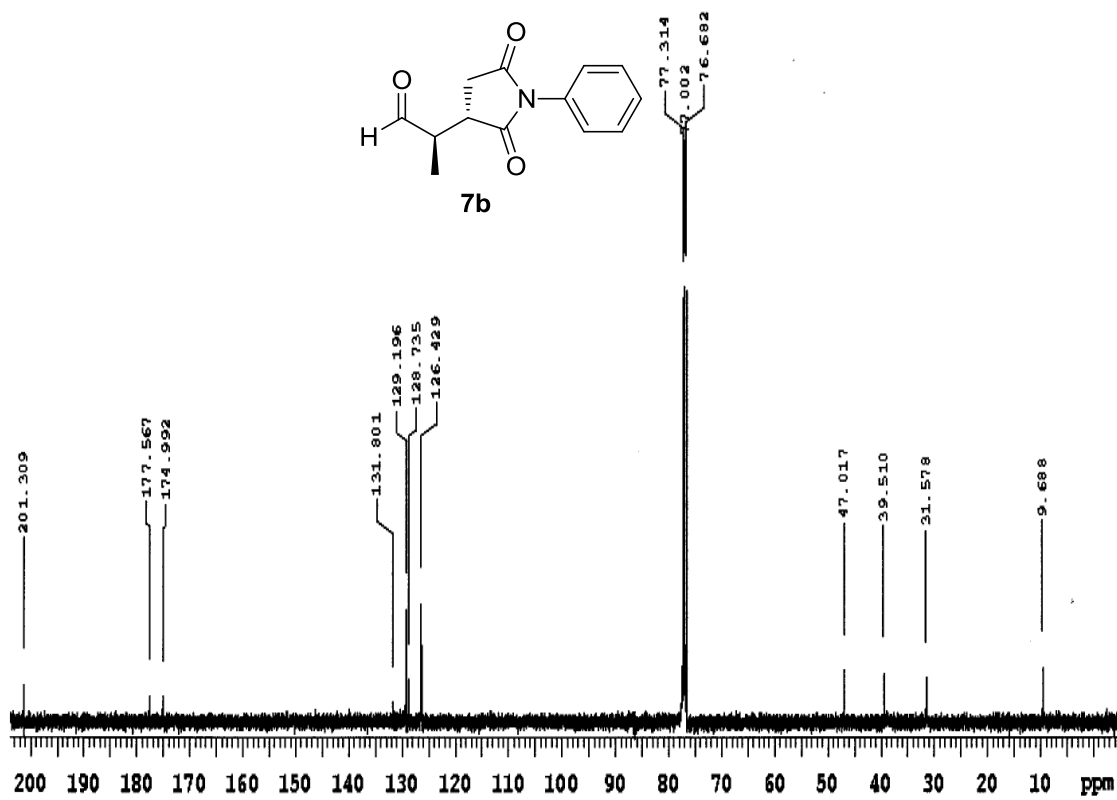



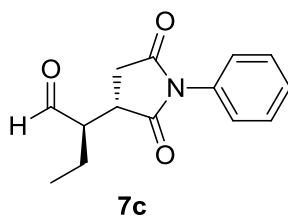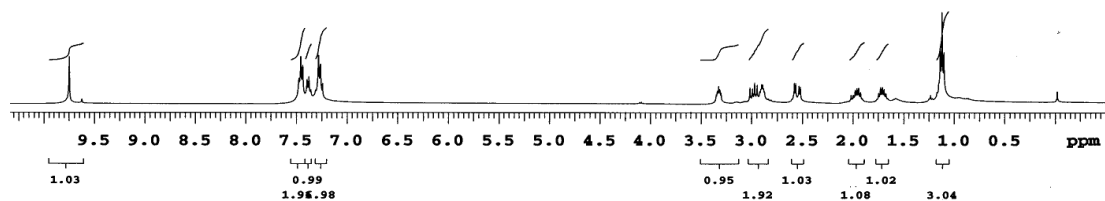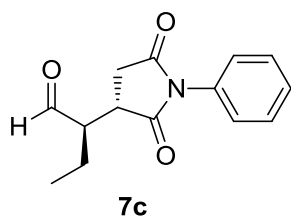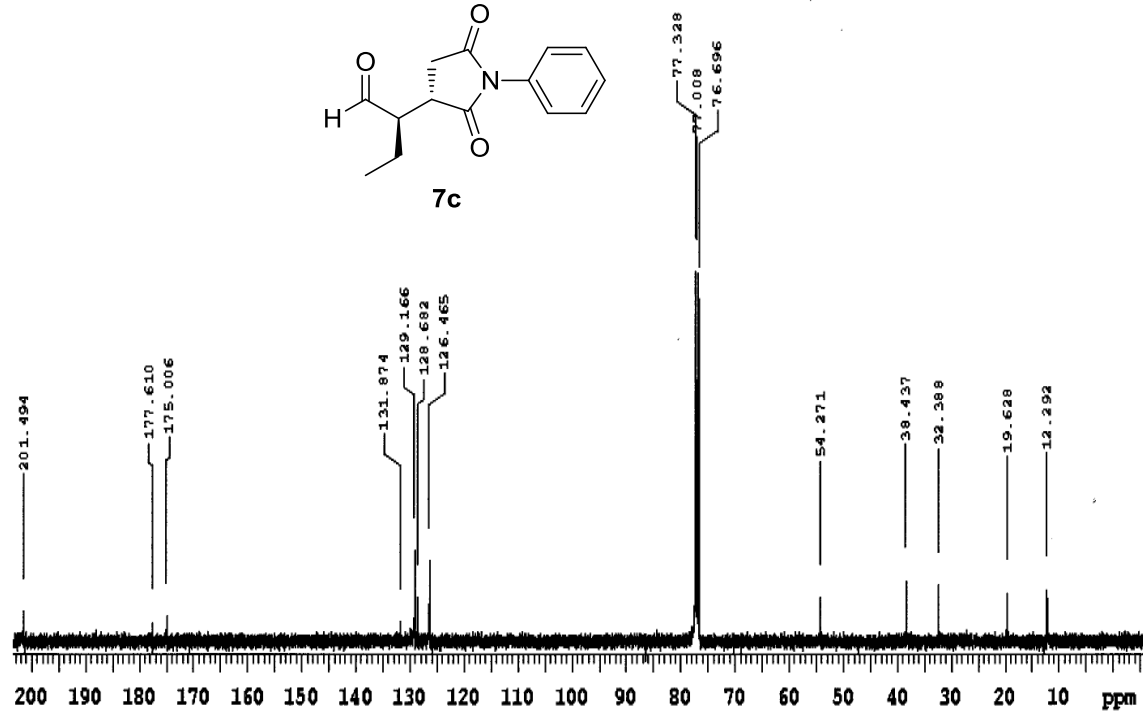

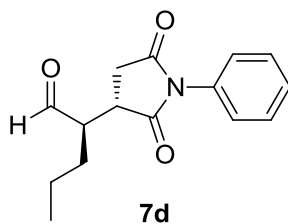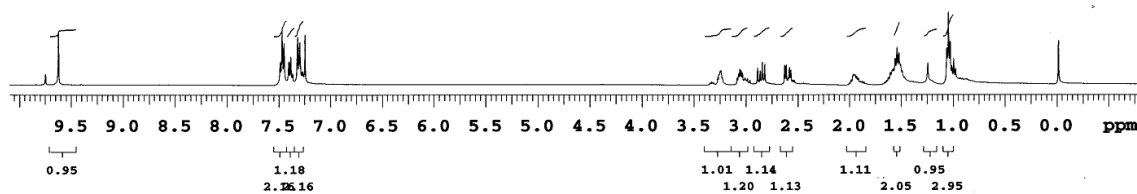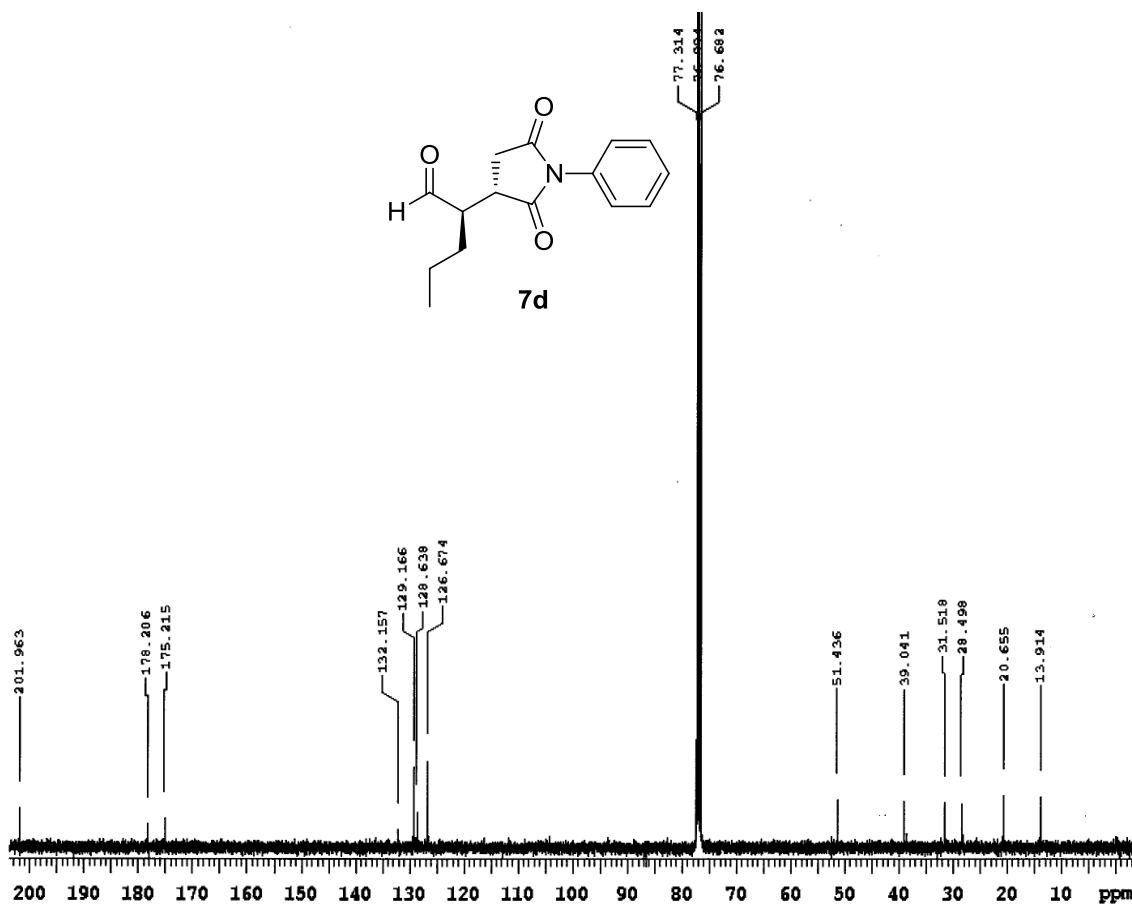

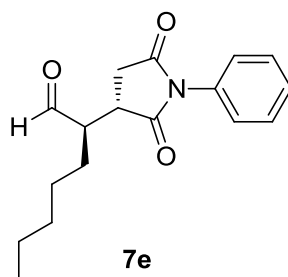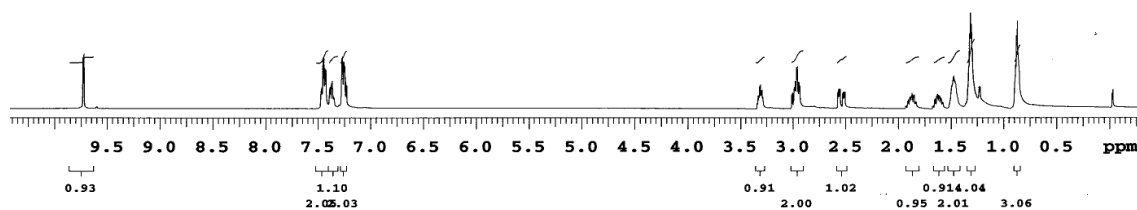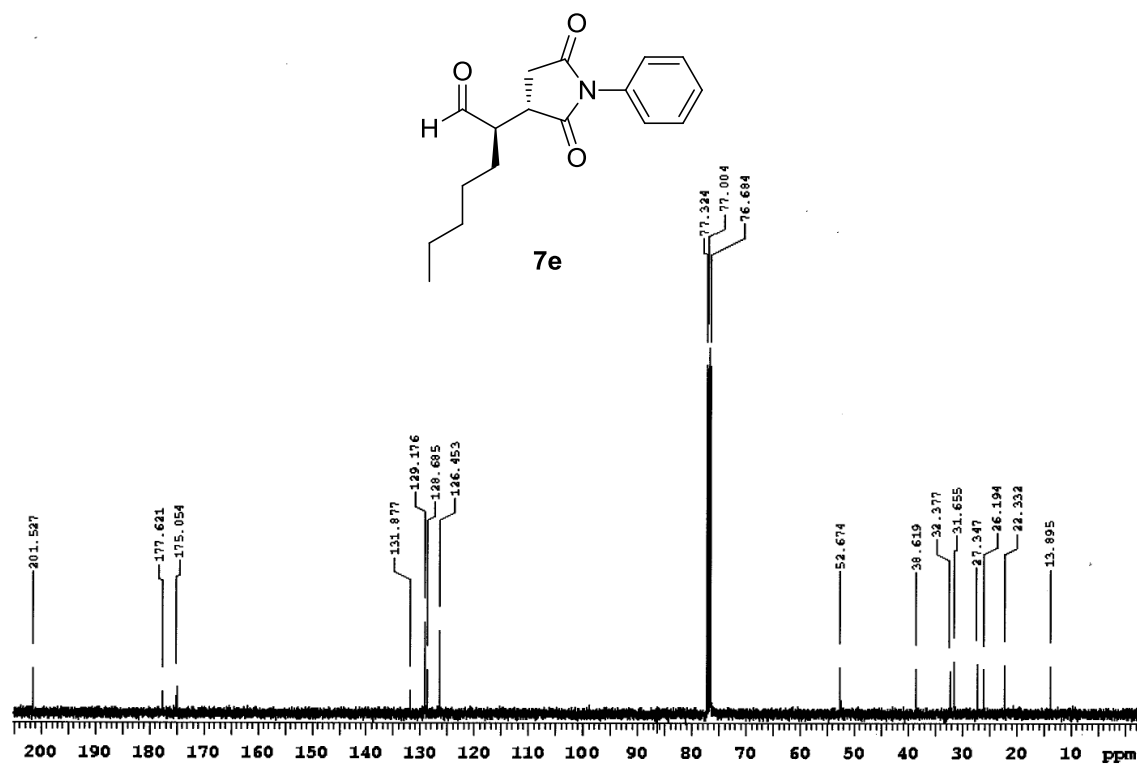

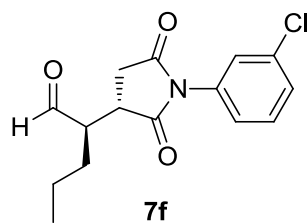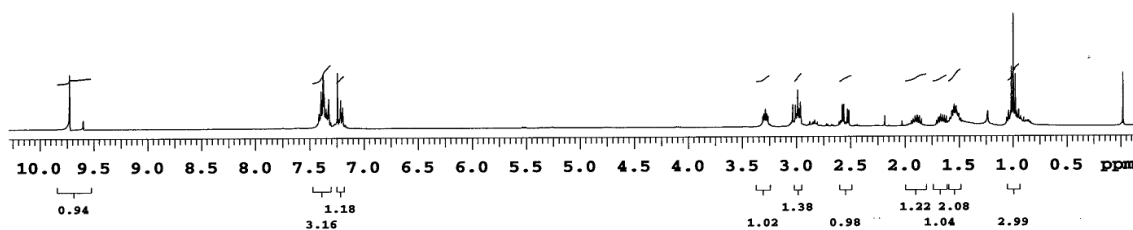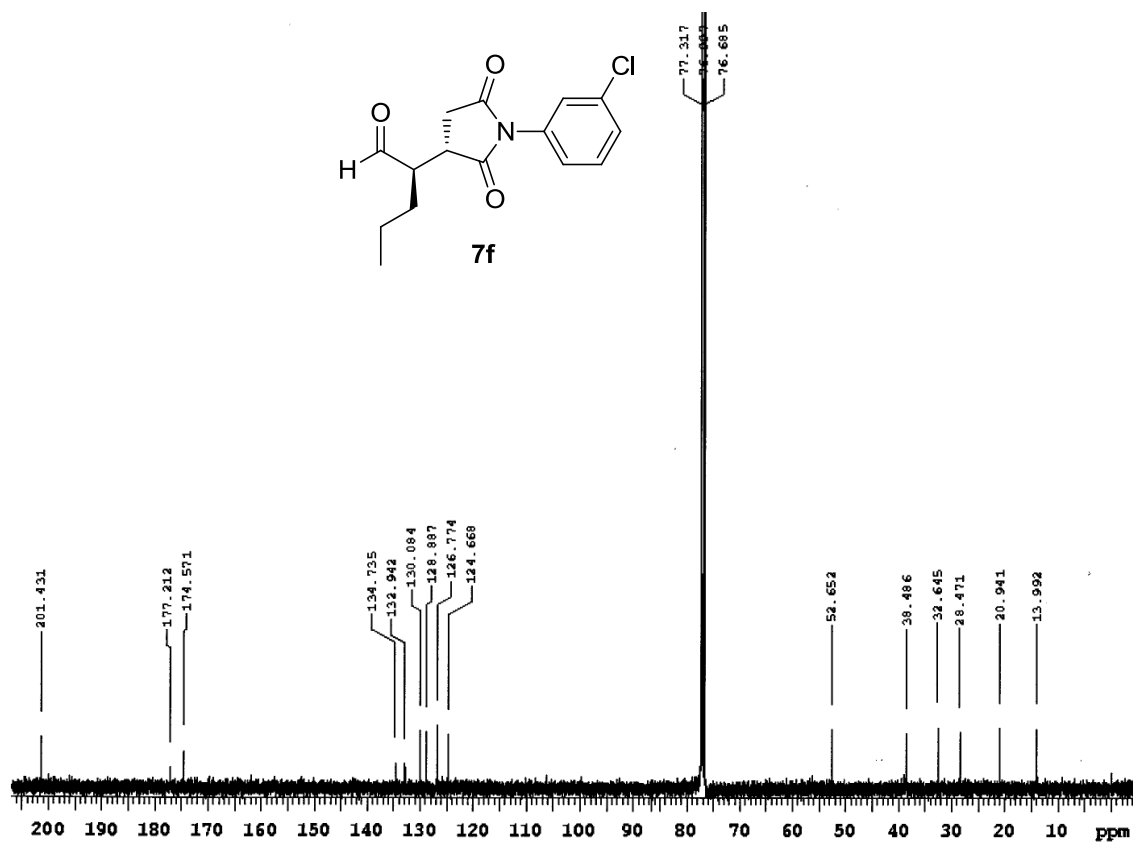

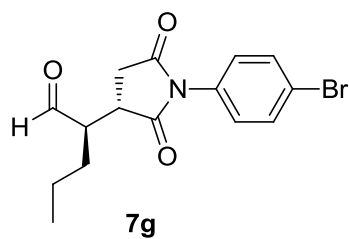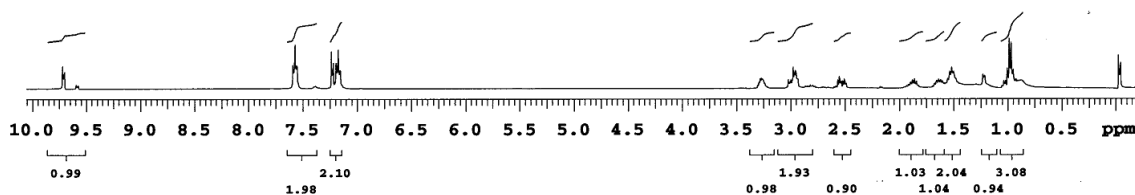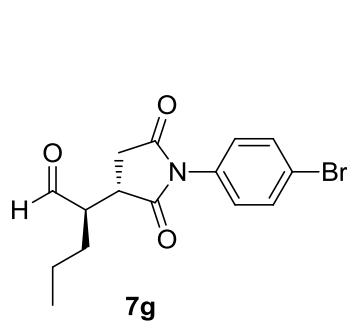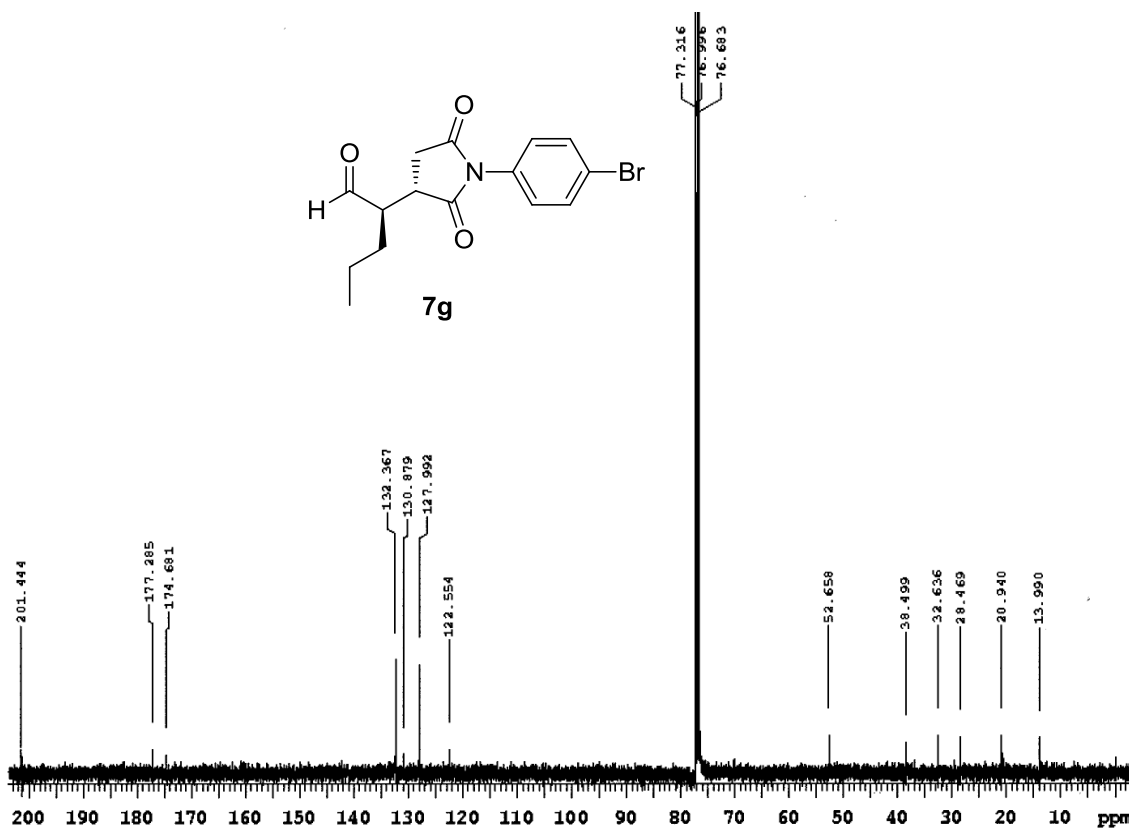

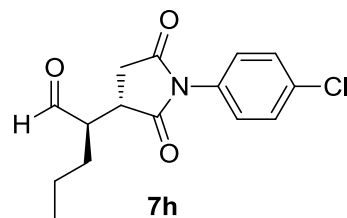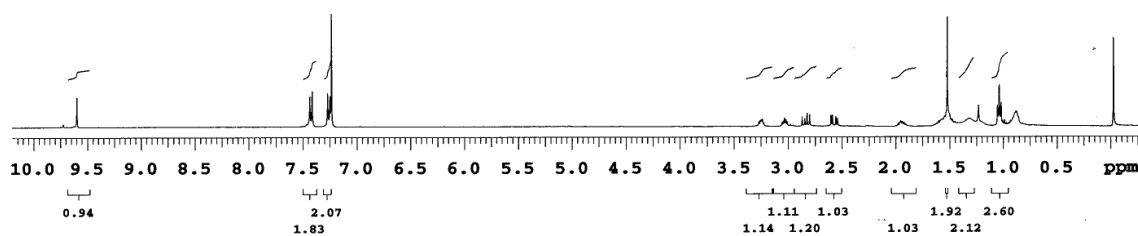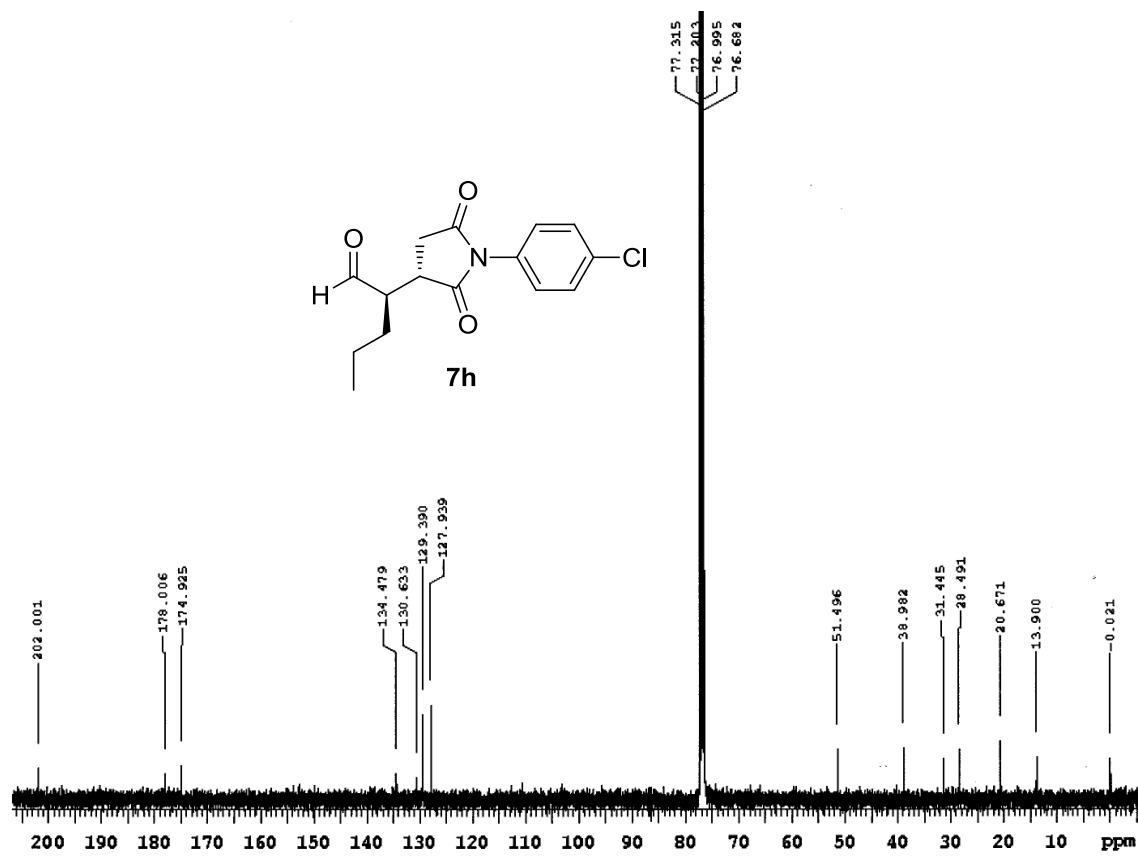

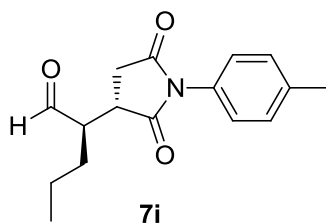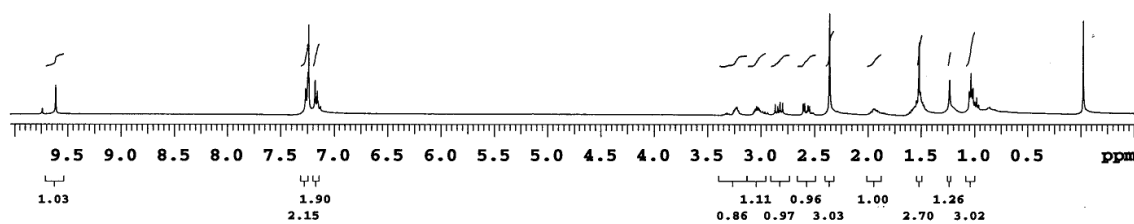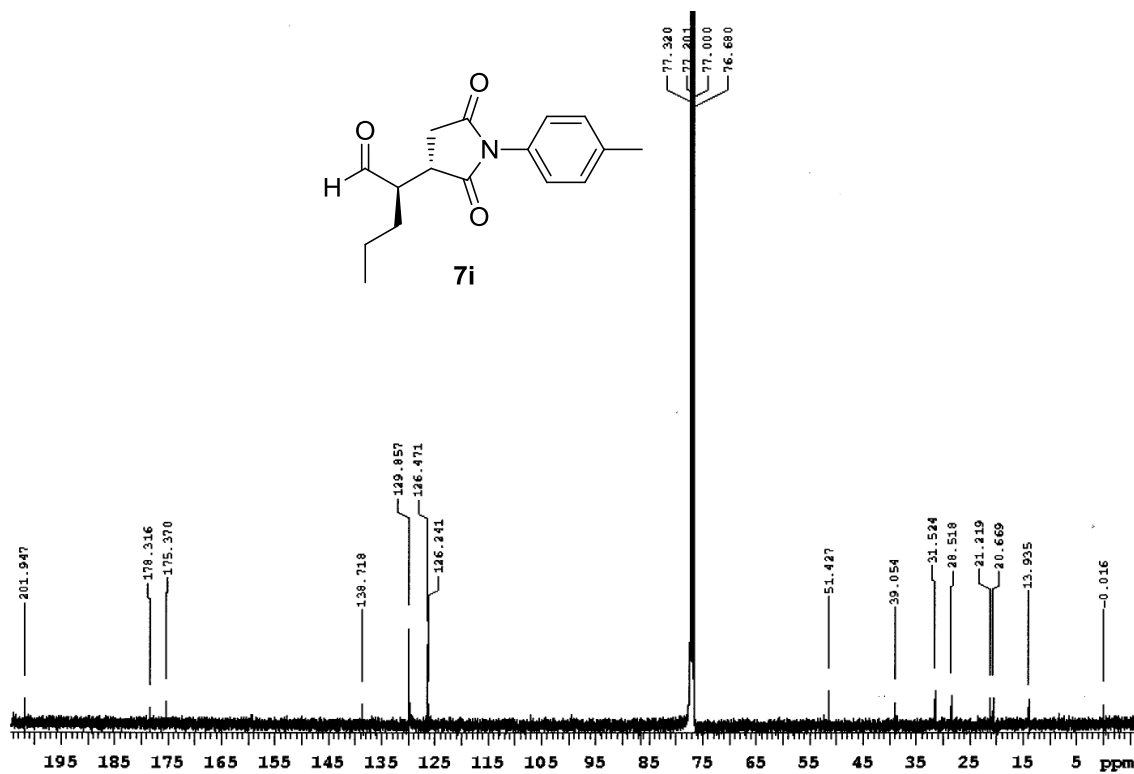

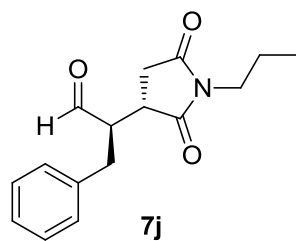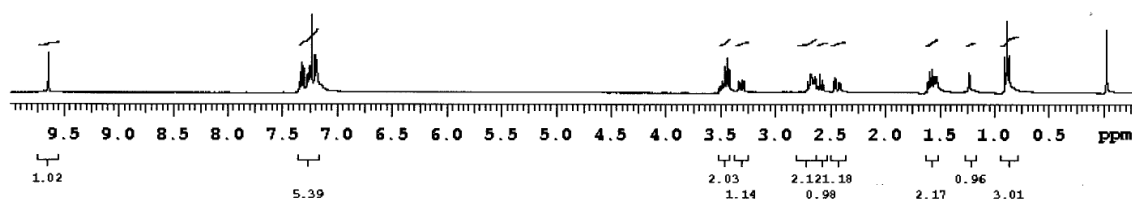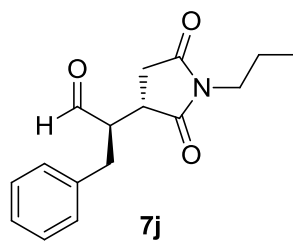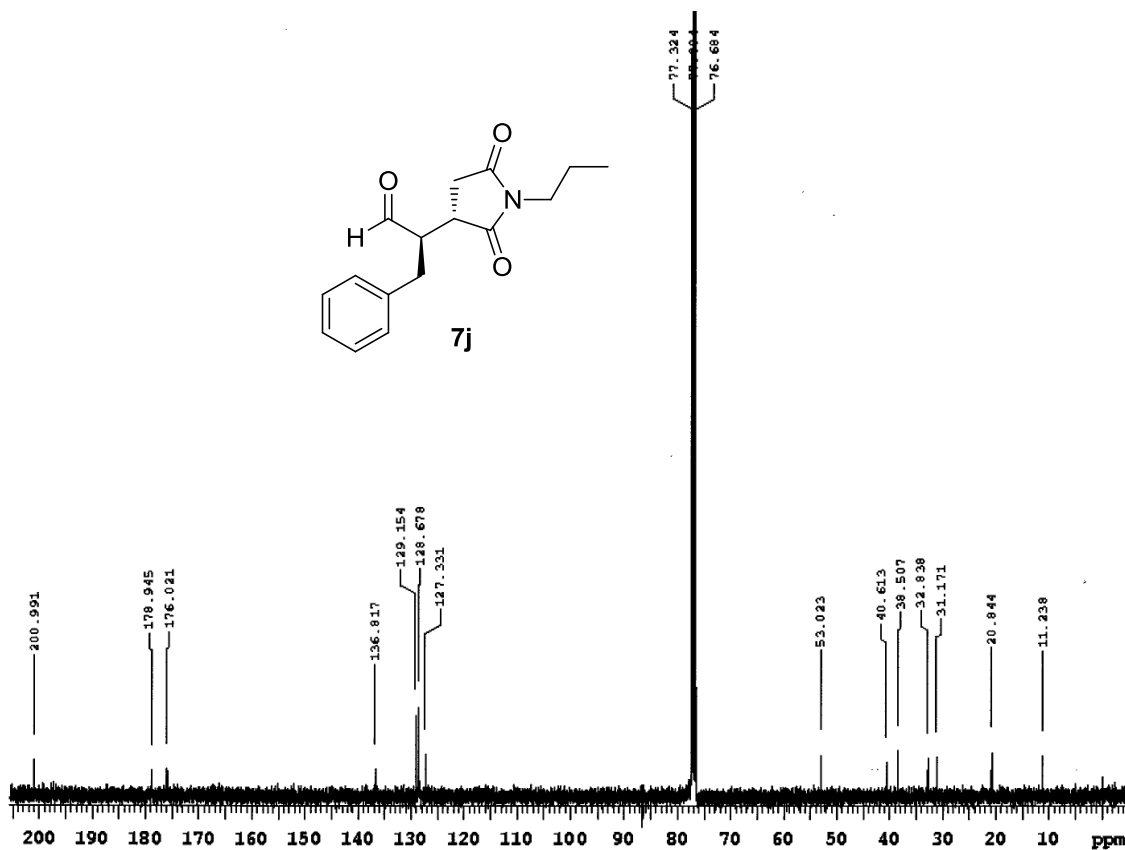



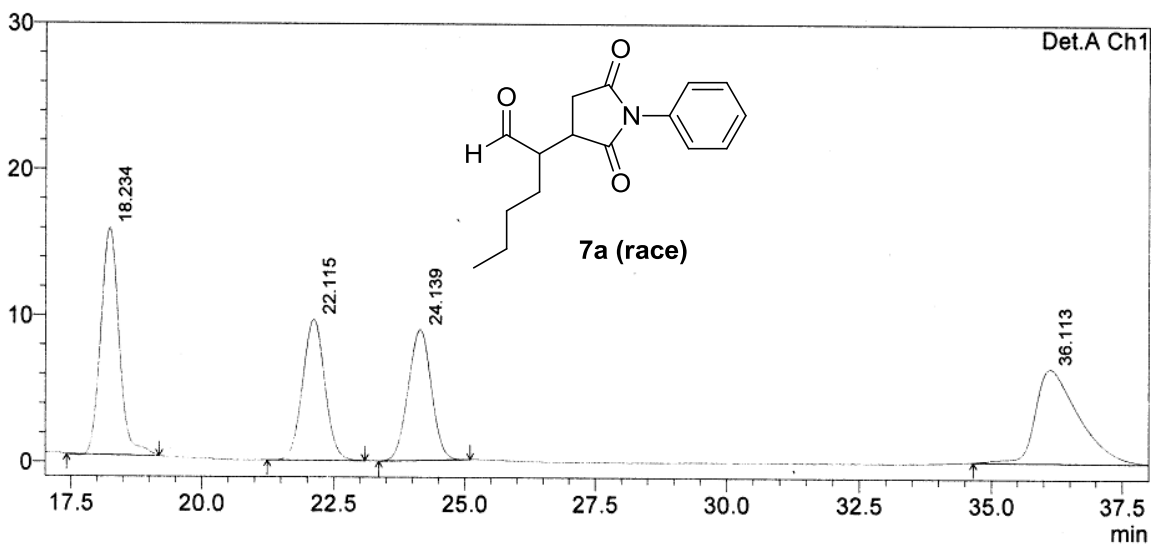

Detector A Ch1 254nm

| Peak# | Ret. Time | Area    | Height | Area %  | Height % |
|-------|-----------|---------|--------|---------|----------|
| 1     | 18.234    | 376578  | 15493  | 28.872  | 38.316   |
| 2     | 22.115    | 283485  | 9627   | 21.735  | 23.809   |
| 3     | 24.139    | 275198  | 8916   | 21.099  | 22.049   |
| 4     | 36.113    | 369038  | 6399   | 28.294  | 15.826   |
| Total |           | 1304299 | 40435  | 100.000 | 100.000  |

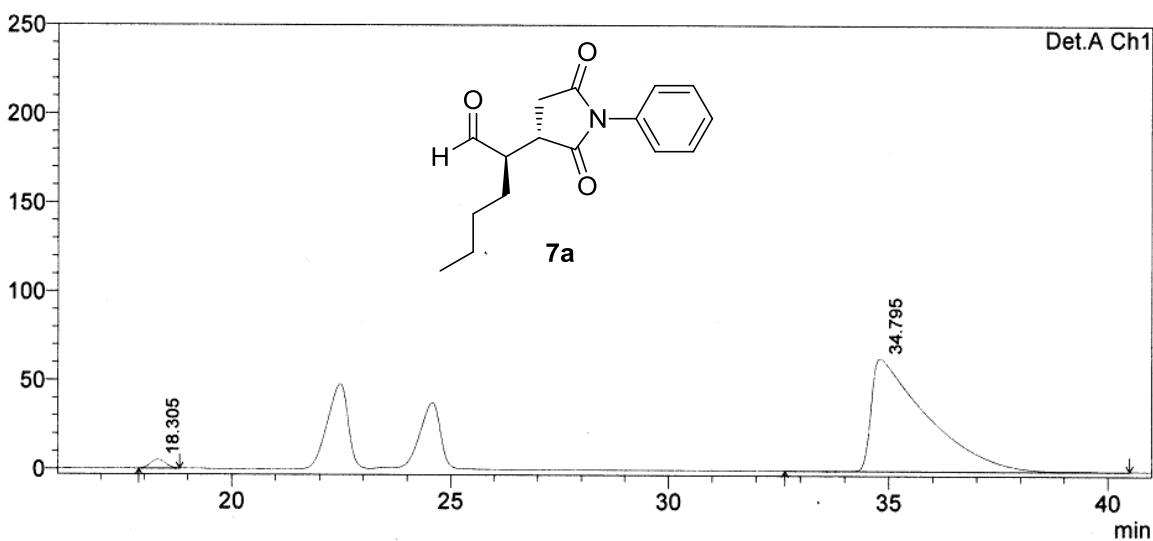

Detector A Ch1 254nm

| Peak# | Ret. Time | Area    | Height | Area %  | Height % |
|-------|-----------|---------|--------|---------|----------|
| 1     | 18.305    | 117243  | 4938   | 2.079   | 7.229    |
| 2     | 34.795    | 5523105 | 63376  | 97.921  | 92.771   |
| Total |           | 5640347 | 68314  | 100.000 | 100.000  |

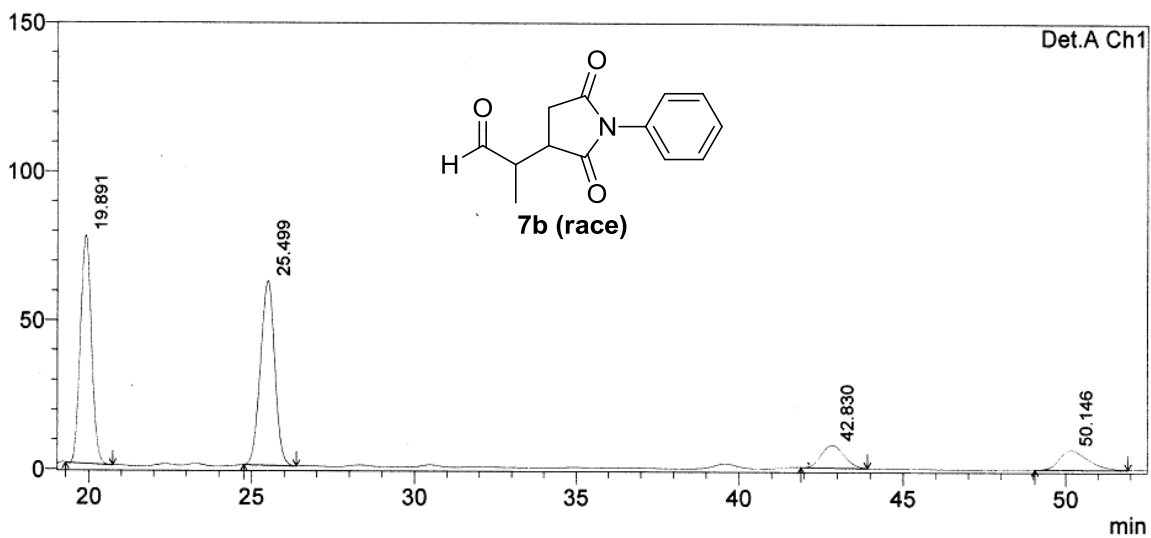

Detector A Ch1 254nm

| Peak# | Ret. Time | Area    | Height | Area %  | Height % |
|-------|-----------|---------|--------|---------|----------|
| 1     | 19.891    | 1847531 | 76740  | 41.032  | 50.206   |
| 2     | 25.499    | 1890434 | 62005  | 41.985  | 40.566   |
| 3     | 42.830    | 367573  | 7637   | 8.163   | 4.997    |
| 4     | 50.146    | 397107  | 6468   | 8.819   | 4.231    |
| Total |           | 4502646 | 152850 | 100.000 | 100.000  |

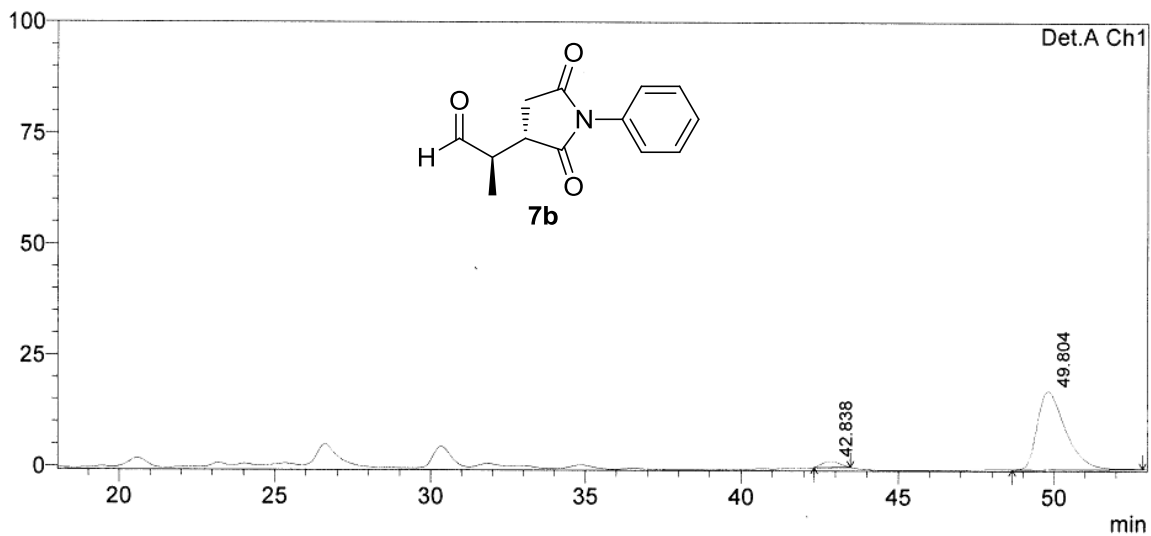

Detector A Ch1 254nm

| Peak# | Ret. Time | Area    | Height | Area %  | Height % |
|-------|-----------|---------|--------|---------|----------|
| 1     | 42.838    | 51917   | 1328   | 4.440   | 7.051    |
| 2     | 49.804    | 1117369 | 17507  | 95.560  | 92.949   |
| Total |           | 1169285 | 18835  | 100.000 | 100.000  |

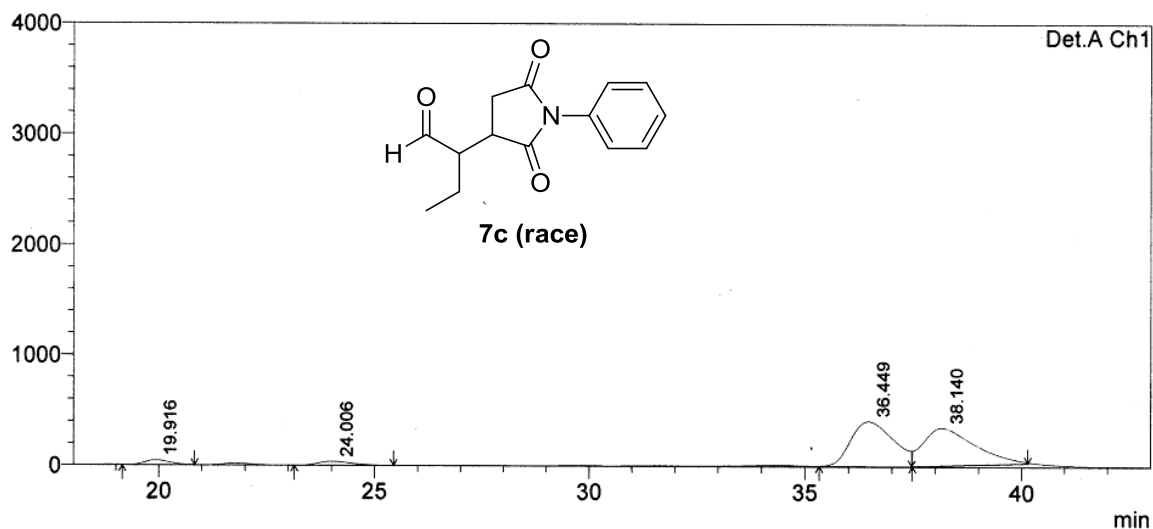

Detector A Ch1 254nm

| Peak# | Ret. Time | Area     | Height | Area %  | Height % |
|-------|-----------|----------|--------|---------|----------|
| 1     | 19.916    | 1723508  | 43198  | 2.916   | 5.261    |
| 2     | 24.006    | 1820534  | 35626  | 3.080   | 4.339    |
| 3     | 36.449    | 27463276 | 403948 | 46.468  | 49.198   |
| 4     | 38.140    | 28094296 | 338298 | 47.536  | 41.202   |
| Total |           | 59101615 | 821069 | 100.000 | 100.000  |

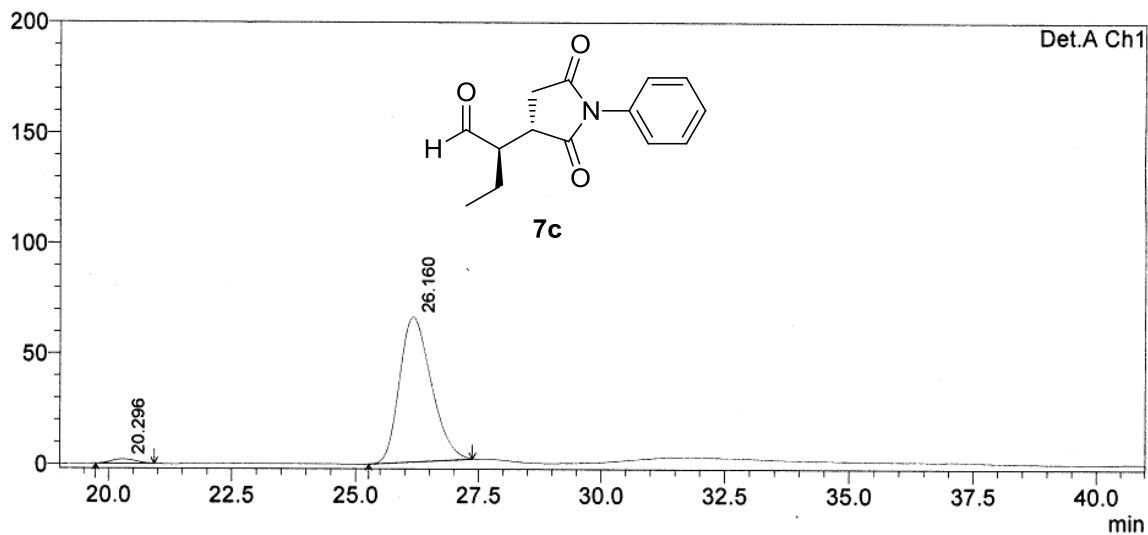

Detector A Ch1 254nm

| Peak# | Ret. Time | Area    | Height | Area %  | Height % |
|-------|-----------|---------|--------|---------|----------|
| 1     | 20.296    | 64847   | 1943   | 2.159   | 2.881    |
| 2     | 26.160    | 2938416 | 65484  | 97.841  | 97.119   |
| Total |           | 3003263 | 67426  | 100.000 | 100.000  |

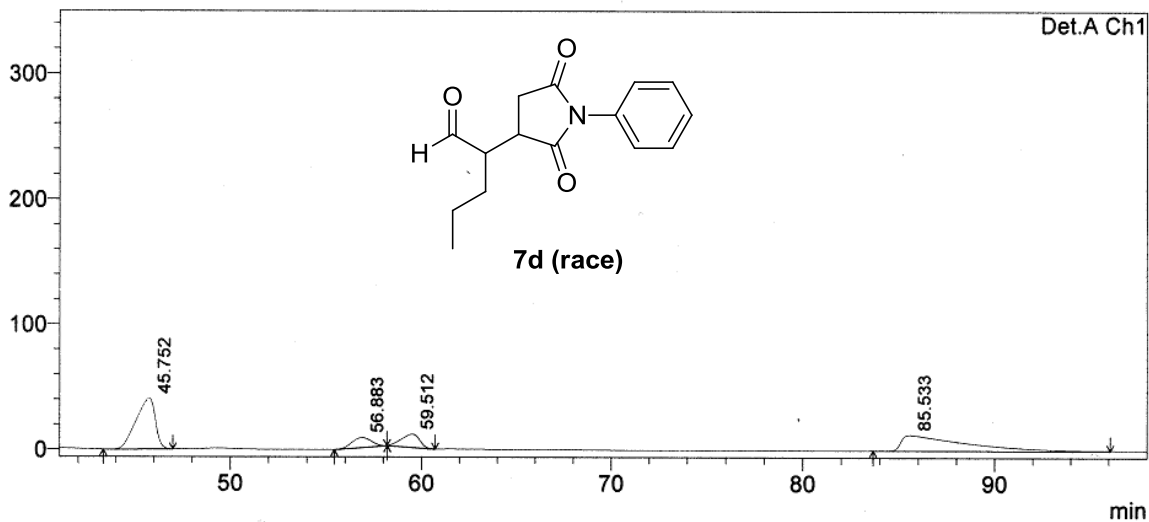

Detector A Ch1 254nm

| Peak# | Ret. Time | Area    | Height | Area %  | Height % |
|-------|-----------|---------|--------|---------|----------|
| 1     | 45.752    | 2859963 | 40611  | 41.011  | 56.864   |
| 2     | 56.883    | 549618  | 7892   | 7.881   | 11.050   |
| 3     | 59.512    | 692161  | 10526  | 9.925   | 14.739   |
| 4     | 85.533    | 2871861 | 12389  | 41.182  | 17.348   |
| Total |           | 6973603 | 71419  | 100.000 | 100.000  |

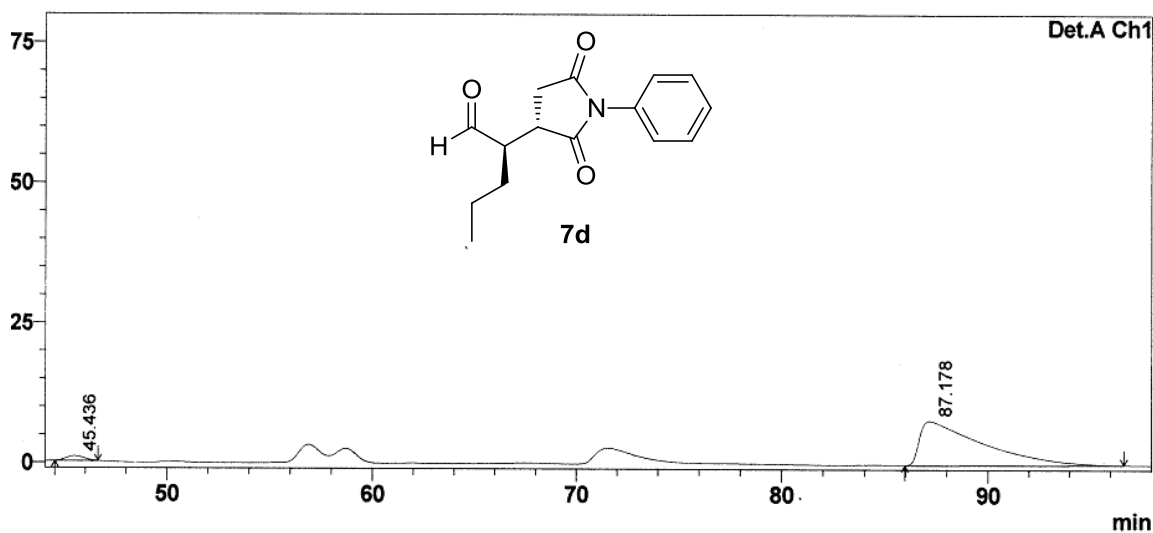

Detector A Ch1 254nm

| Peak# | Ret. Time | Area    | Height | Area %  | Height % |
|-------|-----------|---------|--------|---------|----------|
| 1     | 45.436    | 51913   | 844    | 3.011   | 9.738    |
| 2     | 87.178    | 1671947 | 7825   | 96.989  | 90.262   |
| Total |           | 1723860 | 8669   | 100.000 | 100.000  |

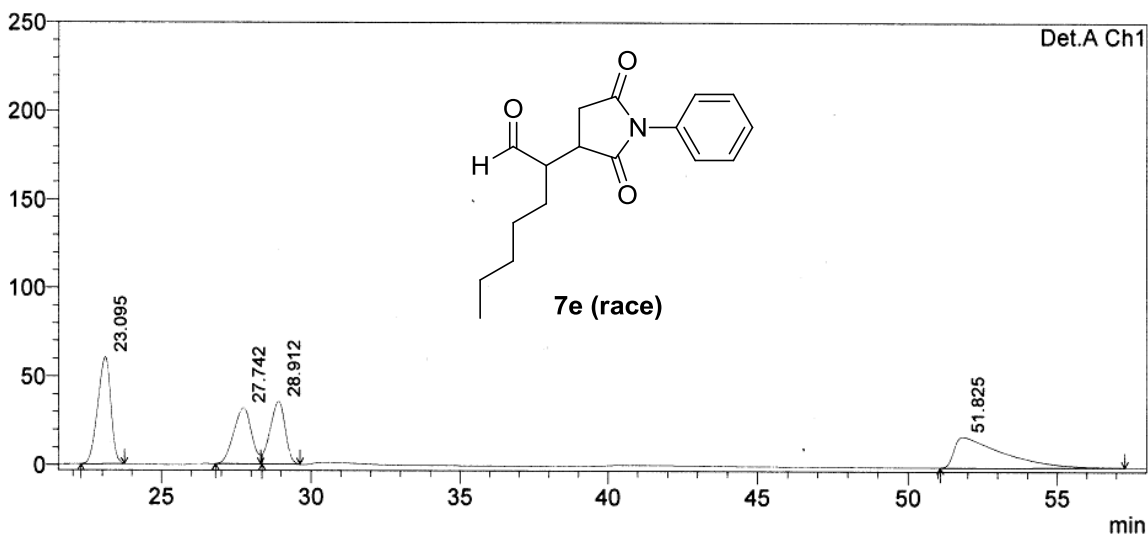

Detector A Ch1 254nm

| Peak# | Ret. Time | Area    | Height | Area %  | Height % |
|-------|-----------|---------|--------|---------|----------|
| 1     | 23.095    | 1858773 | 60162  | 29.355  | 41.642   |
| 2     | 27.742    | 1310676 | 31687  | 20.699  | 21.933   |
| 3     | 28.912    | 1224774 | 35362  | 19.342  | 24.477   |
| 4     | 51.825    | 1937851 | 17262  | 30.604  | 11.948   |
| Total |           | 6332074 | 144473 | 100.000 | 100.000  |

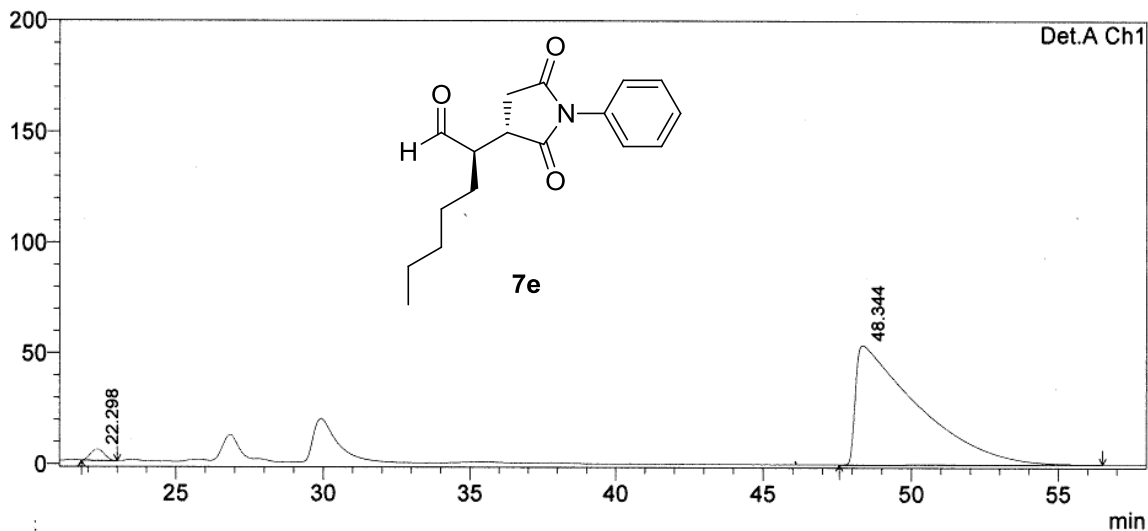

Detector A Ch1 254nm

| Peak# | Ret. Time | Area    | Height | Area %  | Height % |
|-------|-----------|---------|--------|---------|----------|
| 1     | 22.298    | 164298  | 5082   | 2.065   | 8.641    |
| 2     | 48.344    | 7792222 | 53736  | 97.935  | 91.359   |
| Total |           | 7956520 | 58818  | 100.000 | 100.000  |

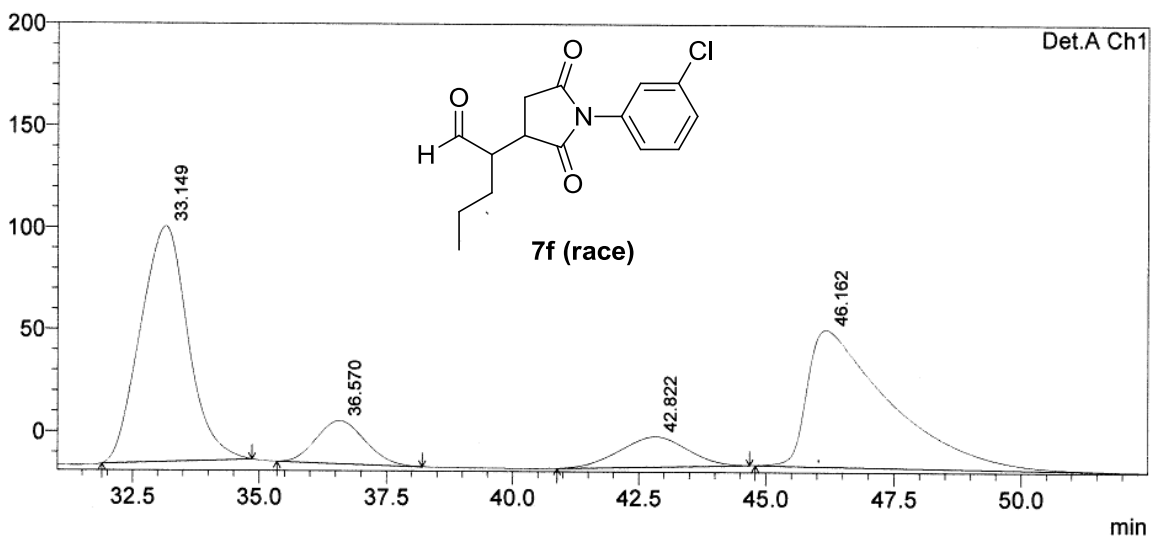

Detector A Ch1 254nm

| Peak# | Ret. Time | Area     | Height | Area %  | Height % |
|-------|-----------|----------|--------|---------|----------|
| 1     | 33.149    | 7538746  | 115353 | 42.540  | 52.983   |
| 2     | 36.570    | 1390266  | 20942  | 7.845   | 9.619    |
| 3     | 42.822    | 1360395  | 14717  | 7.676   | 6.760    |
| 4     | 46.162    | 7432272  | 66704  | 41.939  | 30.638   |
| Total |           | 17721679 | 217716 | 100.000 | 100.000  |

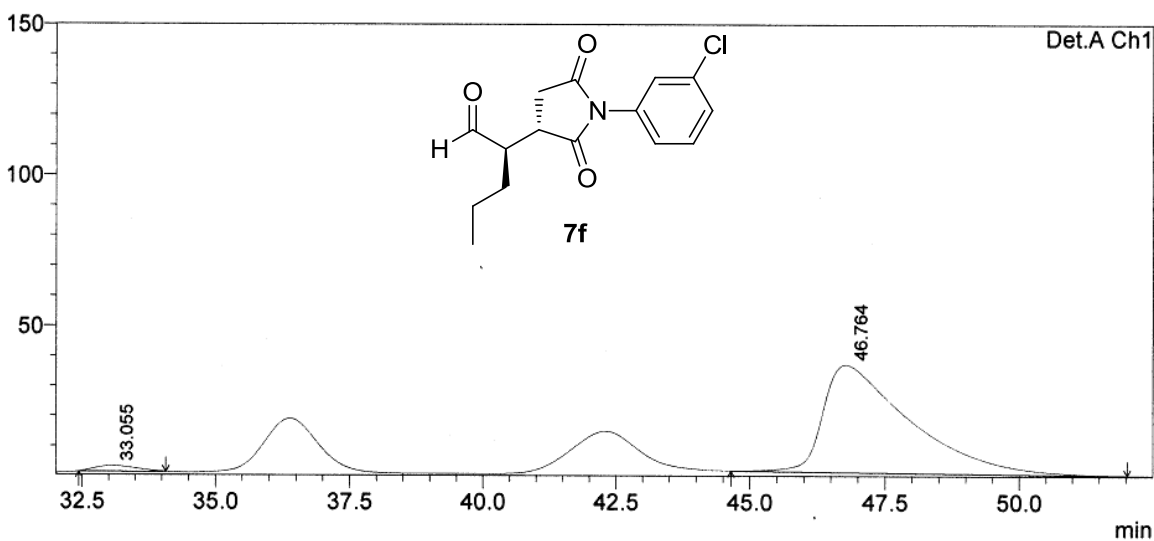

Detector A Ch1 254nm

| Peak# | Ret. Time | Area    | Height | Area %  | Height % |
|-------|-----------|---------|--------|---------|----------|
| 1     | 33.055    | 96324   | 1830   | 2.374   | 4.884    |
| 2     | 46.764    | 3961376 | 35627  | 97.626  | 95.116   |
| Total |           | 4057700 | 37457  | 100.000 | 100.000  |

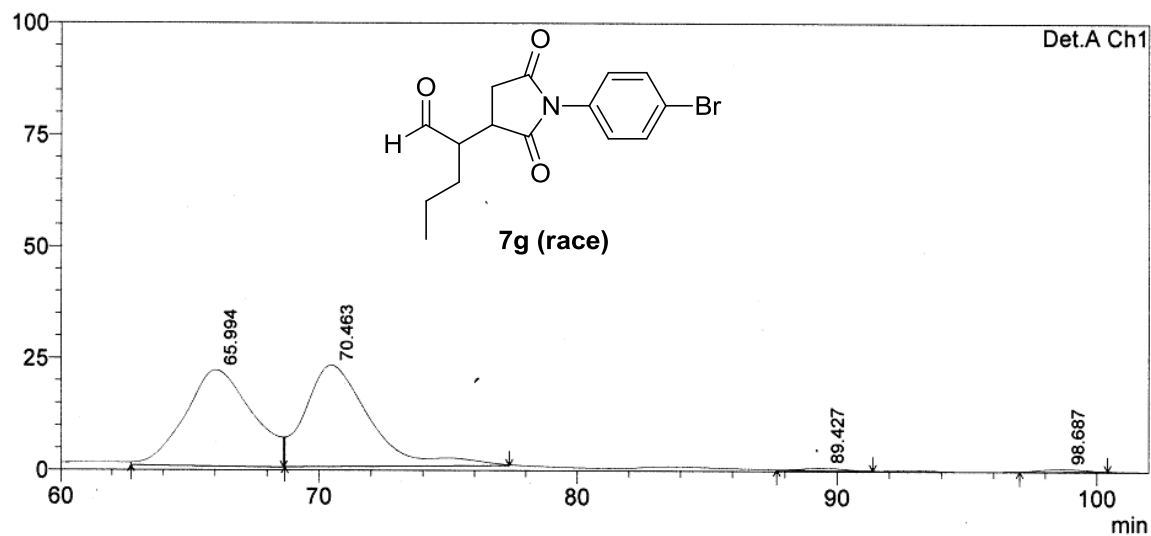

Detector A Ch1 254nm

| Peak# | Ret. Time | Area    | Height | Area %  | Height % |
|-------|-----------|---------|--------|---------|----------|
| 1     | 65.994    | 3850206 | 21427  | 49.051  | 47.508   |
| 2     | 70.463    | 3883250 | 22588  | 49.472  | 50.083   |
| 3     | 89.427    | 52656   | 541    | 0.671   | 1.199    |
| 4     | 98.687    | 63202   | 546    | 0.805   | 1.210    |
| Total |           | 7849314 | 45101  | 100.000 | 100.000  |

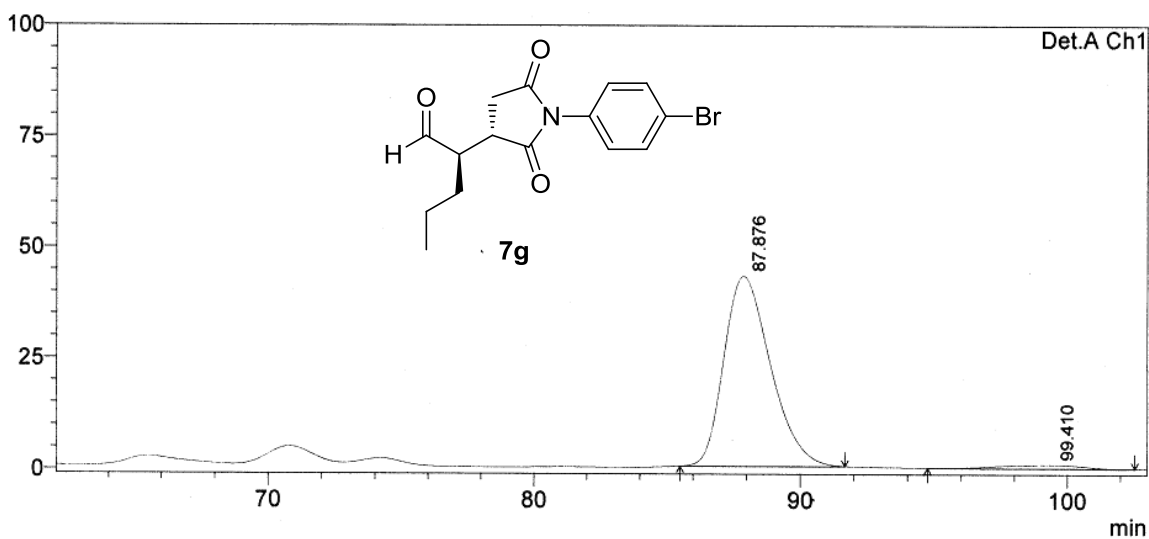

Detector A Ch1 254nm

| Peak# | Ret. Time | Area    | Height | Area %  | Height % |
|-------|-----------|---------|--------|---------|----------|
| 1     | 87.876    | 5174607 | 42769  | 96.734  | 98.046   |
| 2     | 99.410    | 174692  | 852    | 3.266   | 1.954    |
| Total |           | 5349299 | 43621  | 100.000 | 100.000  |

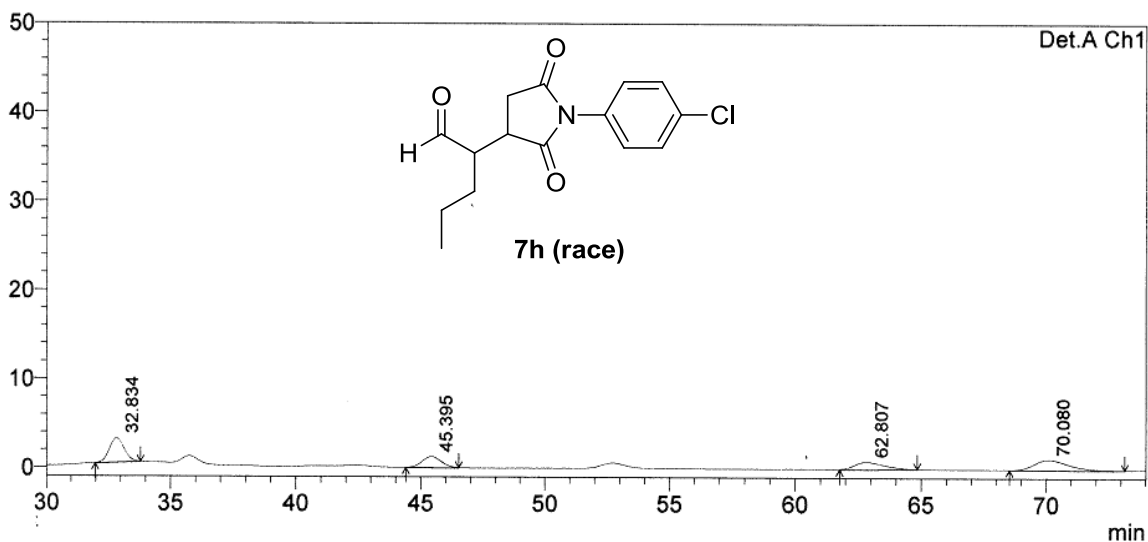

Detector A Ch1 254nm

| Peak# | Ret. Time | Area   | Height | Area %  | Height % |
|-------|-----------|--------|--------|---------|----------|
| 1     | 32.834    | 112348 | 2716   | 31.541  | 45.734   |
| 2     | 45.395    | 65499  | 1239   | 18.388  | 20.858   |
| 3     | 62.807    | 67338  | 821    | 18.905  | 13.823   |
| 4     | 70.080    | 111015 | 1163   | 31.166  | 19.585   |
| Total |           | 356199 | 5938   | 100.000 | 100.000  |

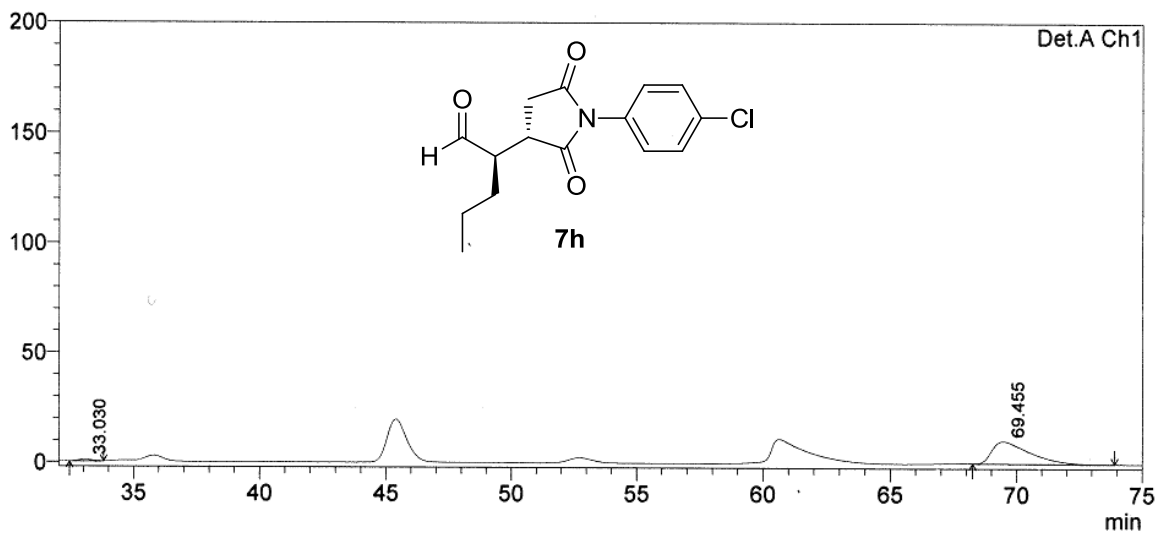

Detector A Ch1 254nm

| Peak# | Ret. Time | Area    | Height | Area %  | Height % |
|-------|-----------|---------|--------|---------|----------|
| 1     | 33.030    | 27074   | 733    | 2.470   | 6.731    |
| 2     | 69.455    | 1068959 | 10159  | 97.530  | 93.269   |
| Total |           | 1096033 | 10893  | 100.000 | 100.000  |



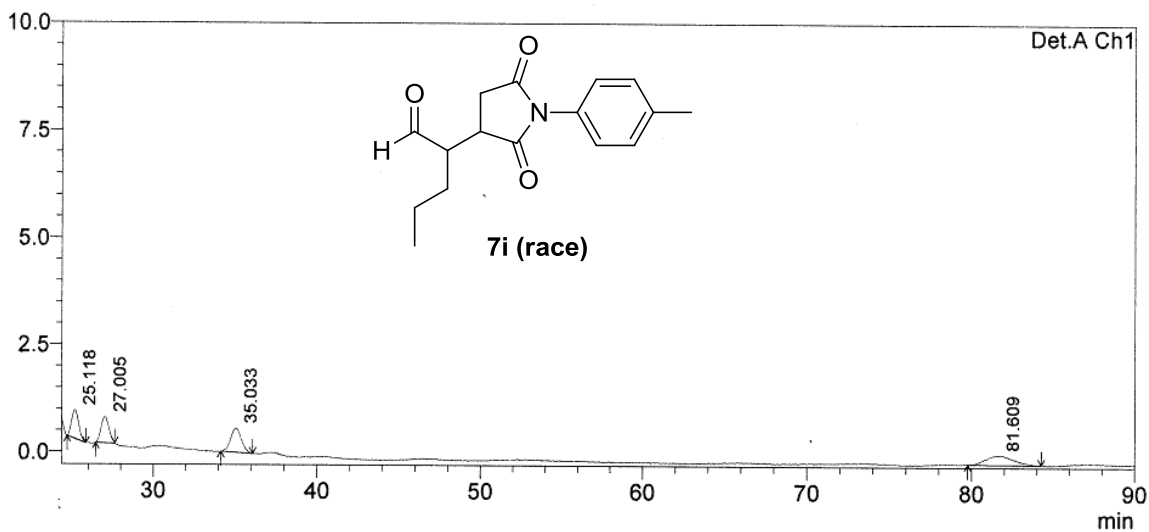

Detector A Ch1 254nm

| Peak# | Ret. Time | Area  | Height | Area %  | Height % |
|-------|-----------|-------|--------|---------|----------|
| 1     | 25.118    | 20291 | 660    | 22.062  | 32.170   |
| 2     | 27.005    | 20542 | 607    | 22.334  | 29.560   |
| 3     | 35.033    | 25106 | 562    | 27.296  | 27.352   |
| 4     | 81.609    | 26037 | 224    | 28.308  | 10.919   |
| Total |           | 91977 | 2053   | 100.000 | 100.000  |

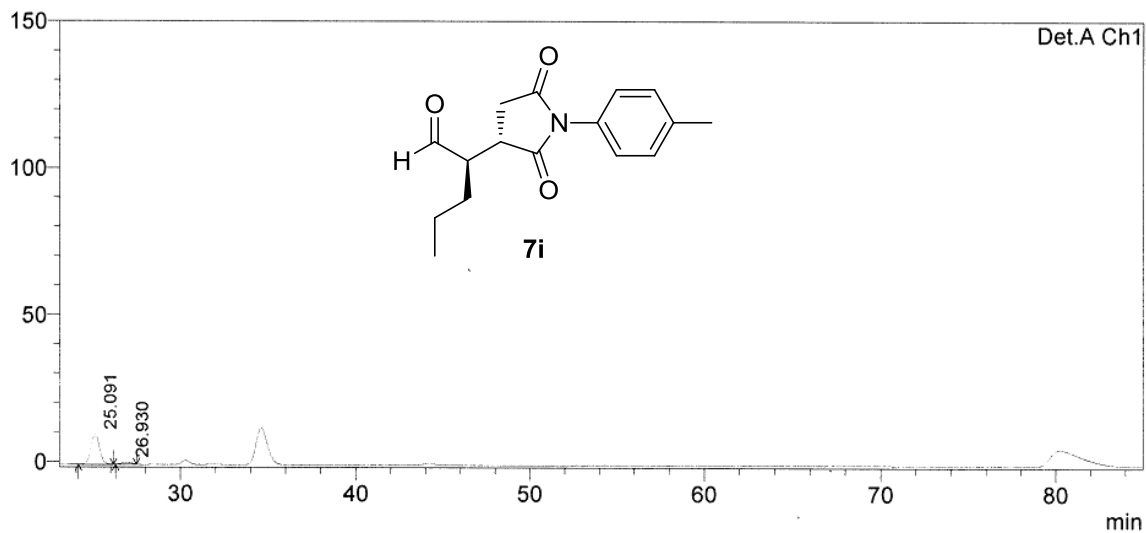

Detector A Ch1 254nm

| Peak# | Ret. Time | Area   | Height | Area %  | Height % |
|-------|-----------|--------|--------|---------|----------|
| 1     | 25.091    | 355385 | 10303  | 93.245  | 93.800   |
| 2     | 26.930    | 25745  | 681    | 6.755   | 6.200    |
| Total |           | 381130 | 10984  | 100.000 | 100.000  |

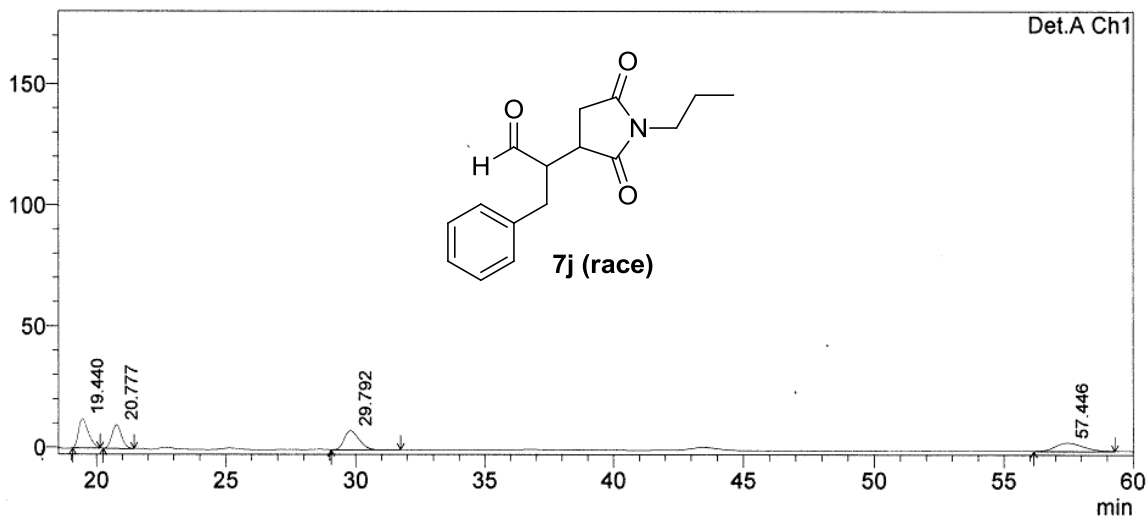

Detector A Ch1 254nm

| Peak# | Ret. Time | Area    | Height | Area %  | Height % |
|-------|-----------|---------|--------|---------|----------|
| 1     | 19.440    | 319350  | 12050  | 28.174  | 36.420   |
| 2     | 20.777    | 251750  | 9728   | 22.210  | 29.402   |
| 3     | 29.792    | 307217  | 7876   | 27.104  | 23.805   |
| 4     | 57.446    | 255158  | 3432   | 22.511  | 10.373   |
| Total |           | 1133474 | 33086  | 100.000 | 100.000  |

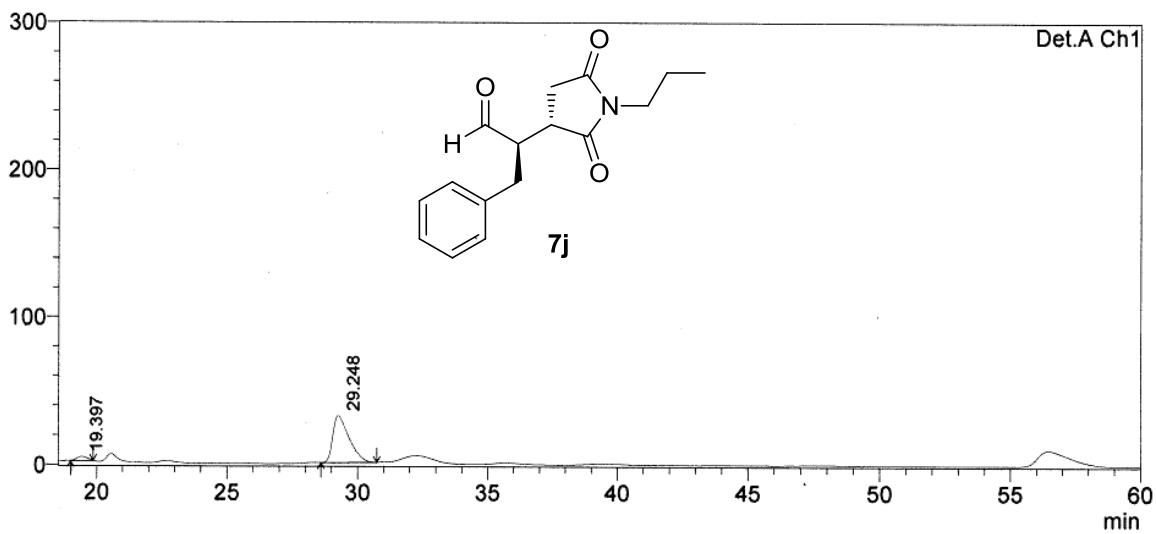

Detector A Ch1 254nm

| Peak# | Ret. Time | Area    | Height | Area %  | Height % |
|-------|-----------|---------|--------|---------|----------|
| 1     | 19.397    | 71673   | 2599   | 5.001   | 7.591    |
| 2     | 29.248    | 1361578 | 31634  | 94.999  | 92.409   |
| Total |           | 1433251 | 34233  | 100.000 | 100.000  |
